# Supplementary material for: Concurrent Host-Pathogen Transcriptional Responses in a Clostridium perfringens Murine Myonecrosis Infection
Source: PubMed Central journal article supplement (PMC5874911; doi:10.1128/mbio.00473-18), 2018-03-27
Supplement: mbo002183811st1.pdf [file mbo002183811st1.pdf]

**TABLE S1** Differentially expressed murine genes in muscle tissues from infected compared to the mock-infected mice\*.

| <b>Ensembl ID</b>   | <b>Gene<sup>a</sup></b> | <b>Log<sub>2</sub> Fold Change</b> | <b>FDR</b> |
|---------------------|-------------------------|------------------------------------|------------|
| ENSMUSG00000058427  | <i>Cxcl2</i>            | 7.04                               | 9.13E-08   |
| ENSMUSG00000038067  | <i>Csf3</i>             | 6.98                               | 3.28E-05   |
| ENSMUSG00000000982  | <i>Ccl3</i>             | 6.83                               | 2.90E-05   |
| ENSMUSG00000058755  | <i>Osm</i>              | 5.88                               | 5.17E-06   |
| ENSMUSG00000032691  | <i>Nlrp3</i>            | 5.86                               | 1.28E-07   |
| ENSMUSG00000044103  | <i>Il1f9</i>            | 5.78                               | 1.08E-05   |
| ENSMUSG00000025746  | <i>Il6</i>              | 5.71                               | 3.60E-08   |
| ENSMUSG00000086849  | <i>Gm13840</i>          | 5.59                               | 4.58E-04   |
| ENSMUSG00000022126  | <i>Irg1</i>             | 5.50                               | 7.79E-07   |
| ENSMUSG00000018930  | <i>Ccl4</i>             | 5.41                               | 1.93E-05   |
| ENSMUSG00000042265  | <i>Trem1</i>            | 5.38                               | 4.04E-06   |
| ENSMUSG00000029380  | <i>Cxcl1</i>            | 5.28                               | 3.47E-08   |
| ENSMUSG00000003665  | <i>Has1</i>             | 5.18                               | 6.88E-07   |
| ENSMUSG000000091387 | <i>Gcnt4</i>            | 5.15                               | 3.02E-05   |
| ENSMUSG00000027398  | <i>Il1b</i>             | 5.14                               | 9.13E-08   |
| ENSMUSG00000027399  | <i>Il1a</i>             | 5.12                               | 4.29E-06   |
| ENSMUSG00000029379  | <i>Cxcl3</i>            | 5.11                               | 5.81E-04   |
| ENSMUSG00000040026  | <i>Saa3</i>             | 5.07                               | 7.71E-03   |
| ENSMUSG00000030142  | <i>Clec4e</i>           | 5.04                               | 6.03E-08   |
| ENSMUSG00000032487  | <i>Ptgs2</i>            | 4.96                               | 1.34E-09   |
| ENSMUSG00000005800  | <i>Mmp8</i>             | 4.80                               | 5.69E-06   |
| ENSMUSG00000035963  | <i>Odf3l2</i>           | 4.70                               | 3.97E-05   |
| ENSMUSG000000054855 | <i>Rnd1</i>             | 4.70                               | 1.14E-05   |
| ENSMUSG00000006403  | <i>Adamts4</i>          | 4.69                               | 3.86E-06   |
| ENSMUSG00000026582  | <i>Sele</i>             | 4.67                               | 2.88E-06   |
| ENSMUSG00000000182  | <i>Fgf23</i>            | 4.64                               | 3.68E-03   |
| ENSMUSG00000046223  | <i>Plaur</i>            | 4.55                               | 1.82E-07   |
| ENSMUSG00000022651  | <i>Retnlg</i>           | 4.47                               | 1.95E-05   |
| ENSMUSG00000045551  | <i>Fpr1</i>             | 4.39                               | 3.29E-04   |
| ENSMUSG00000038418  | <i>Egr1</i>             | 4.35                               | 2.17E-08   |
| ENSMUSG00000079597  | <i>Gm5483</i>           | 4.32                               | 4.75E-03   |
| ENSMUSG00000030474  | <i>Siglece</i>          | 4.29                               | 5.12E-03   |
| ENSMUSG00000003545  | <i>Fosb</i>             | 4.27                               | 1.07E-04   |
| ENSMUSG00000052837  | <i>Junb</i>             | 4.26                               | 1.97E-09   |
| ENSMUSG00000090698  | <i>Apold1</i>           | 4.25                               | 2.70E-09   |
| ENSMUSG00000026073  | <i>Il1r2</i>            | 4.21                               | 7.85E-06   |
| ENSMUSG00000026580  | <i>Selp</i>             | 4.15                               | 6.88E-07   |
| ENSMUSG00000087684  | <i>1200007C13Rik</i>    | 4.15                               | 1.03E-03   |
| ENSMUSG00000026981  | <i>Il1rn</i>            | 4.11                               | 1.78E-07   |
| ENSMUSG00000048572  | <i>E030010A14Rik</i>    | 4.10                               | 1.50E-05   |
| ENSMUSG00000030144  | <i>Clec4d</i>           | 4.07                               | 2.32E-06   |

|                    |                      |      |          |
|--------------------|----------------------|------|----------|
| ENSMUSG00000027360 | <i>Hdc</i>           | 4.01 | 5.29E-08 |
| ENSMUSG00000041754 | <i>Trem3</i>         | 4.01 | 2.15E-03 |
| ENSMUSG00000035356 | <i>Nfkbiz</i>        | 3.97 | 1.34E-09 |
| ENSMUSG00000032515 | <i>Csrnp1</i>        | 3.95 | 5.68E-09 |
| ENSMUSG00000053560 | <i>Ier2</i>          | 3.95 | 4.04E-07 |
| ENSMUSG00000009292 | <i>Trpm2</i>         | 3.90 | 2.12E-05 |
| ENSMUSG00000052212 | <i>Cd177</i>         | 3.84 | 3.63E-04 |
| ENSMUSG00000020205 | <i>Phlda1</i>        | 3.82 | 5.67E-05 |
| ENSMUSG00000036067 | <i>Slc2a6</i>        | 3.81 | 5.71E-05 |
| ENSMUSG00000056071 | <i>S100a9</i>        | 3.81 | 3.52E-08 |
| ENSMUSG00000040152 | <i>Thbs1</i>         | 3.79 | 1.34E-09 |
| ENSMUSG00000044162 | <i>Tnip3</i>         | 3.79 | 4.04E-06 |
| ENSMUSG00000019850 | <i>Tnfaip3</i>       | 3.75 | 1.56E-09 |
| ENSMUSG00000037405 | <i>Icam1</i>         | 3.73 | 1.80E-08 |
| ENSMUSG00000026822 | <i>Lcn2</i>          | 3.73 | 2.26E-07 |
| ENSMUSG00000021250 | <i>Fos</i>           | 3.73 | 5.08E-09 |
| ENSMUSG00000047798 | <i>Cd300lf</i>       | 3.72 | 8.06E-06 |
| ENSMUSG00000021553 | <i>Slc28a3</i>       | 3.71 | 7.58E-03 |
| ENSMUSG00000089672 | <i>Gp49a</i>         | 3.66 | 1.63E-07 |
| ENSMUSG00000078817 | <i>Nlrp12</i>        | 3.65 | 6.18E-03 |
| ENSMUSG00000036040 | <i>Adamtsl2</i>      | 3.64 | 1.94E-06 |
| ENSMUSG00000037411 | <i>Serpine1</i>      | 3.61 | 1.34E-09 |
| ENSMUSG00000086564 | <i>Cd101</i>         | 3.61 | 1.10E-03 |
| ENSMUSG00000061878 | <i>Sphk1</i>         | 3.60 | 2.26E-06 |
| ENSMUSG00000051439 | <i>Cd14</i>          | 3.58 | 1.95E-08 |
| ENSMUSG00000087242 | <i>C78197</i>        | 3.58 | 4.91E-03 |
| ENSMUSG00000056054 | <i>S100a8</i>        | 3.55 | 1.63E-07 |
| ENSMUSG00000044786 | <i>Zfp36</i>         | 3.54 | 1.58E-09 |
| ENSMUSG00000038729 | <i>Akap2</i>         | 3.53 | 3.85E-03 |
| ENSMUSG00000021123 | <i>Rdh12</i>         | 3.53 | 5.01E-06 |
| ENSMUSG00000024737 | <i>Slc15a3</i>       | 3.53 | 1.51E-05 |
| ENSMUSG00000013974 | <i>1810033B17Rik</i> | 3.49 | 2.39E-04 |
| ENSMUSG00000020108 | <i>Ddit4</i>         | 3.48 | 2.26E-07 |
| ENSMUSG00000031303 | <i>Map3k15</i>       | 3.47 | 4.58E-03 |
| ENSMUSG00000016529 | <i>Ii10</i>          | 3.47 | 7.51E-03 |
| ENSMUSG00000042622 | <i>Maff</i>          | 3.46 | 3.52E-08 |
| ENSMUSG00000048489 | <i>8430408G22Rik</i> | 3.45 | 9.04E-07 |
| ENSMUSG00000000204 | <i>Slnf4</i>         | 3.40 | 3.30E-06 |
| ENSMUSG00000028967 | <i>Errfi1</i>        | 3.38 | 1.43E-08 |
| ENSMUSG00000020423 | <i>Btg2</i>          | 3.36 | 1.09E-08 |
| ENSMUSG00000066170 | <i>E230001N04Rik</i> | 3.34 | 3.65E-03 |
| ENSMUSG00000023903 | <i>Mmp25</i>         | 3.33 | 4.68E-03 |
| ENSMUSG00000003752 | <i>Itpkc</i>         | 3.32 | 1.43E-08 |
| ENSMUSG00000048003 | <i>Catsper4</i>      | 3.31 | 7.37E-03 |

|                    |                      |      |          |
|--------------------|----------------------|------|----------|
| ENSMUSG00000054204 | <i>Fam150b</i>       | 3.29 | 9.16E-03 |
| ENSMUSG00000053113 | <i>Socs3</i>         | 3.28 | 5.74E-07 |
| ENSMUSG00000087006 | <i>Gm13889</i>       | 3.28 | 3.82E-03 |
| ENSMUSG0000003484  | <i>Cyp4f18</i>       | 3.27 | 3.13E-06 |
| ENSMUSG00000075122 | <i>Cd80</i>          | 3.26 | 5.61E-06 |
| ENSMUSG00000022602 | <i>Arc</i>           | 3.26 | 5.70E-05 |
| ENSMUSG00000027737 | <i>Slc7a11</i>       | 3.25 | 1.94E-06 |
| ENSMUSG00000026475 | <i>Rgs16</i>         | 3.25 | 1.47E-04 |
| ENSMUSG00000018476 | <i>Kdm6b</i>         | 3.24 | 9.11E-08 |
| ENSMUSG00000021125 | <i>Arg2</i>          | 3.24 | 2.82E-06 |
| ENSMUSG00000024401 | <i>Tnf</i>           | 3.22 | 2.83E-05 |
| ENSMUSG00000048621 | <i>Gm6377</i>        | 3.21 | 3.94E-05 |
| ENSMUSG00000024190 | <i>Dusp1</i>         | 3.20 | 9.71E-08 |
| ENSMUSG00000024912 | <i>Fos11</i>         | 3.19 | 5.10E-03 |
| ENSMUSG00000084956 | <i>Gm16194</i>       | 3.16 | 5.26E-03 |
| ENSMUSG00000044313 | <i>Mab2113</i>       | 3.16 | 1.98E-03 |
| ENSMUSG00000034394 | <i>Lif</i>           | 3.15 | 1.64E-04 |
| ENSMUSG00000034765 | <i>Dusp5</i>         | 3.12 | 1.79E-06 |
| ENSMUSG00000027832 | <i>Ptx3</i>          | 3.11 | 1.21E-07 |
| ENSMUSG00000043953 | <i>Ccl2</i>          | 3.11 | 4.62E-07 |
| ENSMUSG00000074788 | <i>5830416P10Rik</i> | 3.10 | 3.26E-04 |
| ENSMUSG00000030187 | <i>Klra2</i>         | 3.09 | 2.52E-03 |
| ENSMUSG00000025473 | <i>Adam8</i>         | 3.08 | 9.13E-08 |
| ENSMUSG00000059657 | <i>Stfa2l1</i>       | 3.08 | 7.99E-03 |
| ENSMUSG00000002578 | <i>Ikzf4</i>         | 3.08 | 6.12E-03 |
| ENSMUSG00000036931 | <i>Nfkbid</i>        | 3.07 | 4.67E-04 |
| ENSMUSG00000027995 | <i>Tlr2</i>          | 3.06 | 3.47E-08 |
| ENSMUSG00000064147 | <i>Rab44</i>         | 3.05 | 1.37E-04 |
| ENSMUSG00000017737 | <i>Mmp9</i>          | 3.05 | 1.23E-04 |
| ENSMUSG00000031980 | <i>Agt</i>           | 3.04 | 2.68E-06 |
| ENSMUSG00000035385 | <i>Ccl2</i>          | 3.03 | 2.59E-06 |
| ENSMUSG00000031762 | <i>Mt2</i>           | 3.01 | 1.82E-07 |
| ENSMUSG00000031488 | <i>Rab11fip1</i>     | 3.01 | 3.74E-05 |
| ENSMUSG00000024042 | <i>Sik1</i>          | 3.01 | 7.94E-09 |
| ENSMUSG00000028195 | <i>Cyr61</i>         | 3.00 | 5.73E-09 |
| ENSMUSG00000026121 | <i>Sema4c</i>        | 2.99 | 1.24E-07 |
| ENSMUSG00000071637 | <i>Cebpd</i>         | 2.97 | 1.19E-07 |
| ENSMUSG00000028862 | <i>Map3k6</i>        | 2.97 | 1.60E-07 |
| ENSMUSG00000053475 | <i>Tnfaip6</i>       | 2.93 | 8.90E-07 |
| ENSMUSG00000015312 | <i>Gadd45b</i>       | 2.92 | 6.44E-07 |
| ENSMUSG00000079243 | <i>Xirp1</i>         | 2.91 | 4.04E-07 |
| ENSMUSG00000041449 | <i>Serpina3h</i>     | 2.91 | 3.40E-03 |
| ENSMUSG00000024427 | <i>Spry4</i>         | 2.91 | 3.96E-07 |
| ENSMUSG00000045502 | <i>Niacr1</i>        | 2.90 | 1.48E-05 |

|                    |                 |      |          |
|--------------------|-----------------|------|----------|
| ENSMUSG00000021025 | <i>Nfkbia</i>   | 2.90 | 2.20E-08 |
| ENSMUSG00000052749 | <i>Trim30b</i>  | 2.88 | 1.06E-03 |
| ENSMUSG00000028214 | <i>Gem</i>      | 2.87 | 5.84E-07 |
| ENSMUSG00000029371 | <i>Cxcl5</i>    | 2.86 | 9.07E-04 |
| ENSMUSG00000028859 | <i>Csf3r</i>    | 2.86 | 3.71E-05 |
| ENSMUSG00000064246 | <i>Chi3l1</i>   | 2.85 | 5.20E-03 |
| ENSMUSG00000055994 | <i>Nod2</i>     | 2.85 | 1.29E-05 |
| ENSMUSG00000028680 | <i>Plk3</i>     | 2.85 | 1.32E-05 |
| ENSMUSG00000040435 | <i>Ppp1r15a</i> | 2.85 | 2.35E-07 |
| ENSMUSG00000049130 | <i>C5ar1</i>    | 2.84 | 3.57E-05 |
| ENSMUSG00000026819 | <i>Slc25a25</i> | 2.80 | 8.40E-06 |
| ENSMUSG00000039232 | <i>Stx11</i>    | 2.79 | 8.02E-06 |
| ENSMUSG00000023034 | <i>Nr4a1</i>    | 2.79 | 3.67E-08 |
| ENSMUSG00000053175 | <i>Bcl3</i>     | 2.78 | 1.75E-04 |
| ENSMUSG00000079293 | <i>Clec7a</i>   | 2.78 | 1.07E-04 |
| ENSMUSG00000037868 | <i>Egr2</i>     | 2.78 | 4.74E-06 |
| ENSMUSG00000040264 | <i>Gbp5</i>     | 2.75 | 4.05E-06 |
| ENSMUSG00000062593 | <i>Lilrb4</i>   | 2.74 | 1.67E-07 |
| ENSMUSG00000029321 | <i>Slc10a6</i>  | 2.74 | 9.24E-06 |
| ENSMUSG00000023067 | <i>Cdkn1a</i>   | 2.74 | 2.26E-07 |
| ENSMUSG00000033508 | <i>Asprv1</i>   | 2.73 | 3.27E-03 |
| ENSMUSG00000068699 | <i>Flnc</i>     | 2.72 | 1.24E-07 |
| ENSMUSG00000001156 | <i>Mxd1</i>     | 2.71 | 1.58E-07 |
| ENSMUSG00000017009 | <i>Sdc4</i>     | 2.70 | 8.68E-09 |
| ENSMUSG00000047945 | <i>Marcks1</i>  | 2.70 | 3.02E-05 |
| ENSMUSG00000047443 | <i>Fam132b</i>  | 2.68 | 1.93E-03 |
| ENSMUSG00000026840 | <i>Lamc3</i>    | 2.67 | 7.57E-04 |
| ENSMUSG00000054364 | <i>Rhob</i>     | 2.66 | 3.87E-08 |
| ENSMUSG00000080810 | <i>Gm11737</i>  | 2.66 | 4.16E-03 |
| ENSMUSG00000024014 | <i>Pim1</i>     | 2.64 | 1.07E-06 |
| ENSMUSG00000006445 | <i>Epha2</i>    | 2.63 | 6.98E-06 |
| ENSMUSG00000020120 | <i>Plek</i>     | 2.61 | 2.20E-08 |
| ENSMUSG00000031504 | <i>Rab20</i>    | 2.61 | 7.48E-05 |
| ENSMUSG00000040907 | <i>Atp1a3</i>   | 2.60 | 7.15E-03 |
| ENSMUSG00000029135 | <i>Fosl2</i>    | 2.60 | 1.45E-08 |
| ENSMUSG00000052270 | <i>Fpr2</i>     | 2.58 | 3.40E-03 |
| ENSMUSG00000018899 | <i>Irf1</i>     | 2.57 | 9.13E-08 |
| ENSMUSG00000034936 | <i>Arl4d</i>    | 2.57 | 2.63E-06 |
| ENSMUSG00000037447 | <i>Arid5a</i>   | 2.55 | 3.09E-07 |
| ENSMUSG00000056501 | <i>Cebpb</i>    | 2.55 | 6.03E-08 |
| ENSMUSG00000035640 | <i>Dos</i>      | 2.55 | 3.38E-03 |
| ENSMUSG00000038587 | <i>Akap12</i>   | 2.52 | 2.75E-08 |
| ENSMUSG00000050370 | <i>Ch25h</i>    | 2.51 | 1.97E-03 |
| ENSMUSG00000003541 | <i>Ier3</i>     | 2.51 | 6.06E-06 |

|                    |                      |      |          |
|--------------------|----------------------|------|----------|
| ENSMUSG00000022528 | <i>Hes1</i>          | 2.50 | 1.86E-06 |
| ENSMUSG00000032501 | <i>Trib1</i>         | 2.49 | 2.75E-08 |
| ENSMUSG00000000555 | <i>Itga5</i>         | 2.49 | 3.52E-08 |
| ENSMUSG00000044006 | <i>Cilp2</i>         | 2.47 | 1.46E-05 |
| ENSMUSG00000009772 | <i>Nuak2</i>         | 2.46 | 1.48E-05 |
| ENSMUSG00000003153 | <i>Slc2a3</i>        | 2.45 | 5.55E-06 |
| ENSMUSG00000027068 | <i>Dhrs9</i>         | 2.45 | 2.33E-05 |
| ENSMUSG00000043740 | <i>B430306N03Rik</i> | 2.44 | 2.08E-03 |
| ENSMUSG00000035621 | <i>Midn</i>          | 2.43 | 1.86E-07 |
| ENSMUSG00000038894 | <i>Irs2</i>          | 2.43 | 4.43E-07 |
| ENSMUSG00000004609 | <i>Cd33</i>          | 2.43 | 4.09E-06 |
| ENSMUSG00000078816 | <i>Prkcc</i>         | 2.41 | 3.25E-03 |
| ENSMUSG00000030022 | <i>Adamts9</i>       | 2.39 | 3.60E-08 |
| ENSMUSG00000026180 | <i>Cxcr2</i>         | 2.39 | 1.36E-03 |
| ENSMUSG00000079254 | <i>Itiprip</i>       | 2.39 | 1.19E-05 |
| ENSMUSG00000028834 | <i>Trim63</i>        | 2.38 | 1.83E-07 |
| ENSMUSG00000074001 | <i>Kbtbd5</i>        | 2.38 | 8.70E-07 |
| ENSMUSG00000045534 | <i>Kcna5</i>         | 2.38 | 4.05E-06 |
| ENSMUSG00000024486 | <i>Hbegf</i>         | 2.38 | 2.35E-07 |
| ENSMUSG00000039911 | <i>Spsb1</i>         | 2.37 | 9.03E-06 |
| ENSMUSG00000026459 | <i>Myog</i>          | 2.36 | 5.01E-06 |
| ENSMUSG00000042677 | <i>Zc3h12a</i>       | 2.34 | 6.81E-07 |
| ENSMUSG00000035671 | <i>Zswim4</i>        | 2.34 | 3.75E-06 |
| ENSMUSG00000021453 | <i>Gadd45g</i>       | 2.32 | 2.89E-05 |
| ENSMUSG00000052684 | <i>Jun</i>           | 2.31 | 3.60E-08 |
| ENSMUSG00000025804 | <i>Ccr1</i>          | 2.31 | 7.47E-07 |
| ENSMUSG00000076431 | <i>Sox4</i>          | 2.30 | 3.35E-05 |
| ENSMUSG00000028341 | <i>Nr4a3</i>         | 2.29 | 3.75E-07 |
| ENSMUSG00000031765 | <i>Mt1</i>           | 2.29 | 8.38E-07 |
| ENSMUSG00000028874 | <i>Fgr</i>           | 2.29 | 1.64E-04 |
| ENSMUSG00000064567 | <i>SNORA38</i>       | 2.28 | 4.47E-03 |
| ENSMUSG00000056708 | <i>Ier5</i>          | 2.28 | 4.79E-07 |
| ENSMUSG00000025225 | <i>Nfkb2</i>         | 2.28 | 6.88E-07 |
| ENSMUSG00000026068 | <i>Il18rap</i>       | 2.28 | 2.53E-05 |
| ENSMUSG00000074570 | <i>Cass4</i>         | 2.28 | 9.48E-04 |
| ENSMUSG00000035673 | <i>Sbna2</i>         | 2.28 | 2.60E-06 |
| ENSMUSG00000044562 | <i>Rasip1</i>        | 2.26 | 5.20E-06 |
| ENSMUSG00000042507 | <i>C130039O16Rik</i> | 2.25 | 1.47E-07 |
| ENSMUSG00000089371 | <i>Mir1938</i>       | 2.25 | 4.60E-03 |
| ENSMUSG00000084497 | <i>U6</i>            | 2.25 | 6.73E-03 |
| ENSMUSG00000065592 | <i>Mir145</i>        | 2.24 | 1.24E-04 |
| ENSMUSG00000032000 | <i>Birc3</i>         | 2.24 | 2.28E-07 |
| ENSMUSG00000035373 | <i>Ccl7</i>          | 2.24 | 1.25E-05 |
| ENSMUSG00000022534 | <i>Mefv</i>          | 2.23 | 4.98E-04 |

|                    |                      |      |          |
|--------------------|----------------------|------|----------|
| ENSMUSG0000002910  | <i>Arrdc2</i>        | 2.23 | 6.85E-04 |
| ENSMUSG00000022094 | <i>Slc39a14</i>      | 2.22 | 5.61E-07 |
| ENSMUSG00000015396 | <i>Cd83</i>          | 2.22 | 2.87E-05 |
| ENSMUSG00000020893 | <i>Per1</i>          | 2.21 | 2.30E-06 |
| ENSMUSG00000038059 | <i>2010002N04Rik</i> | 2.21 | 8.90E-05 |
| ENSMUSG00000032661 | <i>Oas3</i>          | 2.21 | 2.13E-03 |
| ENSMUSG00000030852 | <i>Tacc2</i>         | 2.20 | 4.73E-07 |
| ENSMUSG00000022346 | <i>Myc</i>           | 2.20 | 2.47E-05 |
| ENSMUSG00000027894 | <i>Slc6a17</i>       | 2.19 | 5.42E-03 |
| ENSMUSG00000001379 | <i>Apbb3</i>         | 2.18 | 1.80E-06 |
| ENSMUSG00000043415 | <i>Otud1</i>         | 2.18 | 5.03E-05 |
| ENSMUSG00000025185 | <i>Loxl4</i>         | 2.17 | 5.32E-05 |
| ENSMUSG00000006642 | <i>Tcf23</i>         | 2.16 | 7.59E-03 |
| ENSMUSG00000055485 | <i>9830001H06Rik</i> | 2.14 | 2.35E-05 |
| ENSMUSG00000026177 | <i>Slc11a1</i>       | 2.14 | 4.47E-04 |
| ENSMUSG00000034271 | <i>Jdp2</i>          | 2.13 | 2.75E-06 |
| ENSMUSG00000026358 | <i>Rgs1</i>          | 2.13 | 2.75E-03 |
| ENSMUSG00000035828 | <i>Pim3</i>          | 2.13 | 2.56E-07 |
| ENSMUSG00000001227 | <i>Sema6b</i>        | 2.13 | 4.16E-04 |
| ENSMUSG00000016024 | <i>Lbp</i>           | 2.12 | 2.75E-06 |
| ENSMUSG00000025650 | <i>Col7a1</i>        | 2.11 | 1.90E-04 |
| ENSMUSG00000078485 | <i>Plekhn1</i>       | 2.11 | 8.90E-03 |
| ENSMUSG00000018143 | <i>Mafk</i>          | 2.11 | 3.04E-07 |
| ENSMUSG00000030162 | <i>Olr1</i>          | 2.11 | 3.13E-03 |
| ENSMUSG00000011008 | <i>Mcoln2</i>        | 2.11 | 4.29E-05 |
| ENSMUSG00000049988 | <i>Lrrc25</i>        | 2.10 | 3.63E-03 |
| ENSMUSG00000020363 | <i>Gfpt2</i>         | 2.10 | 4.26E-07 |
| ENSMUSG00000019997 | <i>Ctgf</i>          | 2.09 | 6.88E-07 |
| ENSMUSG00000050721 | <i>Plekho2</i>       | 2.08 | 3.09E-07 |
| ENSMUSG00000029478 | <i>Ncor2</i>         | 2.05 | 1.52E-06 |
| ENSMUSG00000090582 | <i>Gm17024</i>       | 2.05 | 2.71E-05 |
| ENSMUSG00000003283 | <i>Hck</i>           | 2.05 | 5.07E-04 |
| ENSMUSG00000022893 | <i>Adamts1</i>       | 2.05 | 1.19E-07 |
| ENSMUSG00000000317 | <i>Bcl6b</i>         | 2.04 | 1.09E-04 |
| ENSMUSG00000078493 | <i>A930039A15Rik</i> | 2.04 | 2.21E-05 |
| ENSMUSG00000032089 | <i>Il10ra</i>        | 2.04 | 8.50E-06 |
| ENSMUSG00000084894 | <i>Gm13834</i>       | 2.04 | 4.64E-04 |
| ENSMUSG00000021281 | <i>Tnfaip2</i>       | 2.03 | 1.44E-06 |
| ENSMUSG00000029228 | <i>Ln timer</i>      | 2.03 | 3.28E-05 |
| ENSMUSG00000023972 | <i>Ptk7</i>          | 2.02 | 7.61E-03 |
| ENSMUSG00000047180 | <i>Neurl3</i>        | 2.02 | 3.35E-04 |
| ENSMUSG00000020901 | <i>Pik3r5</i>        | 2.01 | 3.74E-05 |
| ENSMUSG00000049892 | <i>Rasd1</i>         | 2.01 | 1.97E-03 |
| ENSMUSG00000052911 | <i>Lamb2</i>         | 2.00 | 1.47E-07 |

|                    |                 |       |          |
|--------------------|-----------------|-------|----------|
| ENSMUSG00000073176 | <i>Zfp449</i>   | -2.06 | 1.26E-03 |
| ENSMUSG00000046916 | <i>Myct1</i>    | -2.11 | 4.72E-03 |
| ENSMUSG00000022491 | <i>Glycam1</i>  | -2.12 | 6.96E-04 |
| ENSMUSG00000070168 | <i>U3</i>       | -2.12 | 1.41E-03 |
| ENSMUSG00000065870 | <i>Rnu3a</i>    | -2.14 | 1.17E-05 |
| ENSMUSG00000020335 | <i>Zfp354b</i>  | -2.17 | 7.31E-03 |
| ENSMUSG00000065649 | <i>Snora74a</i> | -2.21 | 5.48E-06 |
| ENSMUSG00000065642 | <i>Snora69</i>  | -2.21 | 1.17E-04 |
| ENSMUSG00000044609 | <i>Gm9294</i>   | -2.21 | 6.07E-03 |
| ENSMUSG00000065359 | <i>SNORD16</i>  | -2.22 | 1.17E-05 |
| ENSMUSG00000080622 | <i>SNORA11</i>  | -2.25 | 1.31E-04 |
| ENSMUSG00000006586 | <i>Runx1t1</i>  | -2.26 | 2.29E-03 |
| ENSMUSG00000070251 | <i>U3</i>       | -2.32 | 6.83E-04 |
| ENSMUSG00000064837 | <i>Snora75</i>  | -2.34 | 1.27E-04 |
| ENSMUSG00000084686 | <i>SNORA19</i>  | -2.38 | 1.21E-04 |
| ENSMUSG00000065208 | <i>SNORA4</i>   | -2.43 | 6.13E-06 |
| ENSMUSG00000064637 | <i>Snora20</i>  | -2.56 | 6.57E-05 |
| ENSMUSG00000077611 | <i>SNORA74</i>  | -2.65 | 1.07E-06 |
| ENSMUSG00000064620 | <i>SNORA32</i>  | -2.72 | 1.37E-04 |
| ENSMUSG00000077756 | <i>Snord90</i>  | -2.76 | 3.04E-04 |
| ENSMUSG00000045871 | <i>Slitrk6</i>  | -2.86 | 9.53E-03 |
| ENSMUSG00000065041 | <i>SNORA62</i>  | -3.07 | 2.22E-07 |
| ENSMUSG00000064451 | <i>Snora23</i>  | -3.09 | 1.35E-07 |
| ENSMUSG00000088990 | <i>SCARNA1</i>  | -3.29 | 7.50E-04 |
| ENSMUSG00000077167 | <i>SNORA53</i>  | -3.30 | 3.60E-08 |
| ENSMUSG00000064917 | <i>snoZ39</i>   | -3.34 | 4.43E-07 |
| ENSMUSG00000064792 | <i>SNORA32</i>  | -3.44 | 1.30E-03 |
| ENSMUSG00000088895 | <i>SNORA81</i>  | -4.14 | 3.31E-03 |

\* Genes that showed a  $\log_2$  (fold change) > 2 and a FDR value of > 0.01 were defined as differentially expressed.
