# Supplementary material for: Concurrent Host-Pathogen Transcriptional Responses in a Clostridium perfringens Murine Myonecrosis Infection
Source: PubMed Central journal article supplement (PMC5874911; doi:10.1128/mbio.00473-18), 2018-03-27
Supplement: mbo002183811st2.pdf [file mbo002183811st2.pdf]

**TABLE S2** Gene set enrichment analyses of up-regulated murine genes in the infected mice compared to the mock-infected mice.

| GO or KEGG ID                                                                   | % of enrichment | p value  |
|---------------------------------------------------------------------------------|-----------------|----------|
| <b>Enriched GO Category</b>                                                     |                 |          |
| GO:0006954~inflammatory response                                                | 11.65           | 2.95E-15 |
| GO:0006955~immune response                                                      | 15.66           | 5.35E-15 |
| GO:0009611~response to wounding                                                 | 13.25           | 6.98E-14 |
| GO:0006952~defense response                                                     | 14.06           | 2.78E-12 |
| GO:0042330~taxis                                                                | 7.23            | 5.08E-10 |
| GO:0006935~chemotaxis                                                           | 7.23            | 5.08E-10 |
| GO:0001817~regulation of cytokine production                                    | 6.83            | 2.95E-07 |
| GO:0007610~behavior                                                             | 10.44           | 1.75E-06 |
| GO:0001819~positive regulation of cytokine production                           | 4.82            | 2.11E-06 |
| GO:0050900~leukocyte migration                                                  | 4.02            | 1.51E-05 |
| GO:0009891~positive regulation of biosynthetic process                          | 11.65           | 1.60E-05 |
| GO:0007626~locomotory behavior                                                  | 7.63            | 2.12E-05 |
| GO:0030595~leukocyte chemotaxis                                                 | 3.21            | 1.45E-04 |
| GO:0060326~cell chemotaxis                                                      | 3.21            | 1.45E-04 |
| GO:0031328~positive regulation of cellular biosynthetic process                 | 10.84           | 2.08E-04 |
| GO:0045944~positive regulation of transcription from RNA polymerase II promoter | 8.43            | 4.64E-04 |
| GO:0002237~response to molecule of bacterial origin                             | 3.61            | 7.95E-04 |
| GO:0009617~response to bacterium                                                | 5.62            | 8.13E-04 |
| GO:0045893~positive regulation of transcription, DNA-dependent                  | 8.84            | 1.22E-03 |
| GO:0010557~positive regulation of macromolecule biosynthetic process            | 10.04           | 1.35E-03 |
| GO:0051254~positive regulation of RNA metabolic process                         | 8.84            | 1.38E-03 |
| GO:0051173~positive regulation of nitrogen compound metabolic process           | 9.64            | 4.20E-03 |
| GO:0002685~regulation of leukocyte migration                                    | 2.01            | 4.88E-03 |
| GO:0006357~regulation of transcription from RNA polymerase II promoter          | 10.44           | 5.67E-03 |
| GO:0044092~negative regulation of molecular function                            | 4.82            | 5.92E-03 |
| GO:0051240~positive regulation of multicellular organismal process              | 5.22            | 7.78E-03 |
| GO:0043410~positive regulation of MAPKKK cascade                                | 3.21            | 8.03E-03 |
| GO:0010604~positive regulation of macromolecule metabolic process               | 10.44           | 9.15E-03 |
| GO:0045941~positive regulation of transcription                                 | 8.84            | 9.99E-03 |
| GO:0007155~cell adhesion                                                        | 9.64            | 1.22E-02 |
| GO:0022610~biological adhesion                                                  | 9.64            | 1.26E-02 |
| GO:0010628~positive regulation of gene expression                               | 8.84            | 1.51E-02 |
| GO:0032496~response to lipopolysaccharide                                       | 2.81            | 2.77E-02 |
| GO:0050830~defense response to Gram-positive bacterium                          | 2.41            | 2.83E-02 |

|                                                                                                         |      |          |
|---------------------------------------------------------------------------------------------------------|------|----------|
| GO:0045935~positive regulation of nucleobase, nucleoside, nucleotide and nucleic acid metabolic process | 8.84 | 2.94E-02 |
| GO:0042742~defense response to bacterium                                                                | 4.02 | 4.64E-02 |
| GO:0002687~positive regulation of leukocyte migration                                                   | 1.61 | 4.97E-02 |
| GO:0032680~regulation of tumor necrosis factor production                                               | 2.41 | 6.48E-02 |
| GO:0002684~positive regulation of immune system process                                                 | 5.22 | 8.17E-02 |
| GO:0032760~positive regulation of tumor necrosis factor production                                      | 2.01 | 8.78E-02 |
| GO:0051051~negative regulation of transport                                                             | 3.21 | 1.38E-01 |
| GO:0030593~neutrophil chemotaxis                                                                        | 2.01 | 1.50E-01 |
| GO:0046888~negative regulation of hormone secretion                                                     | 2.01 | 1.50E-01 |
| GO:0042325~regulation of phosphorylation                                                                | 6.02 | 1.50E-01 |
| GO:0042127~regulation of cell proliferation                                                             | 8.43 | 1.94E-01 |
| GO:0019220~regulation of phosphate metabolic process                                                    | 6.02 | 2.23E-01 |
| GO:0051174~regulation of phosphorus metabolic process                                                   | 6.02 | 2.23E-01 |
| GO:0046883~regulation of hormone secretion                                                              | 2.41 | 2.72E-01 |
| GO:0042981~regulation of apoptosis                                                                      | 8.43 | 2.80E-01 |
| GO:0030335~positive regulation of cell migration                                                        | 2.41 | 3.10E-01 |
| GO:0043067~regulation of programmed cell death                                                          | 8.43 | 3.31E-01 |
| GO:0010941~regulation of cell death                                                                     | 8.43 | 3.55E-01 |
| GO:0008284~positive regulation of cell proliferation                                                    | 5.62 | 4.50E-01 |
| GO:0051674~localization of cell                                                                         | 5.62 | 4.50E-01 |
| GO:0048870~cell motility                                                                                | 5.62 | 4.50E-01 |
| GO:0010740~positive regulation of protein kinase cascade                                                | 3.21 | 4.89E-01 |
| GO:0051272~positive regulation of cell motion                                                           | 2.41 | 5.08E-01 |
| GO:0002221~pattern recognition receptor signaling pathway                                               | 1.61 | 5.64E-01 |
| GO:0032088~negative regulation of NF-kappaB transcription factor activity                               | 1.61 | 5.64E-01 |
| GO:0043408~regulation of MAPKKK cascade                                                                 | 3.21 | 6.86E-01 |
| GO:0010033~response to organic substance                                                                | 7.63 | 7.10E-01 |
| GO:0040017~positive regulation of locomotion                                                            | 2.41 | 7.11E-01 |
| GO:0010627~regulation of protein kinase cascade                                                         | 4.02 | 7.39E-01 |
| GO:0032494~response to peptidoglycan                                                                    | 1.61 | 7.66E-01 |
| GO:0006915~apoptosis                                                                                    | 7.23 | 7.71E-01 |
| GO:0045765~regulation of angiogenesis                                                                   | 2.41 | 7.90E-01 |
| GO:0051046~regulation of secretion                                                                      | 3.61 | 8.05E-01 |
| GO:0012501~programmed cell death                                                                        | 7.23 | 9.35E-01 |
| GO:0051048~negative regulation of secretion                                                             | 2.01 | 9.80E-01 |
| GO:0002758~innate immune response-activating signal transduction                                        | 1.61 | 1.01E+00 |
| GO:0016477~cell migration                                                                               | 4.82 | 1.32E+00 |
| GO:0006953~acute-phase response                                                                         | 2.01 | 1.48E+00 |
| GO:0051100~negative regulation of binding                                                               | 2.01 | 1.48E+00 |
| GO:0001568~blood vessel development                                                                     | 4.82 | 1.50E+00 |
| GO:0009967~positive regulation of signal transduction                                                   | 4.02 | 1.56E+00 |
| GO:0001775~cell activation                                                                              | 4.82 | 1.61E+00 |
| GO:0006928~cell motion                                                                                  | 6.02 | 1.63E+00 |

|                                                                   |       |          |
|-------------------------------------------------------------------|-------|----------|
| GO:0002218~activation of innate immune response                   | 1.61  | 1.63E+00 |
| GO:0002263~cell activation during immune response                 | 2.01  | 1.67E+00 |
| GO:0002366~leukocyte activation during immune response            | 2.01  | 1.67E+00 |
| GO:0001944~vasculature development                                | 4.82  | 1.83E+00 |
| GO:0032675~regulation of interleukin-6 production                 | 2.01  | 1.89E+00 |
| GO:0051726~regulation of cell cycle                               | 4.42  | 1.94E+00 |
| GO:0008219~cell death                                             | 7.23  | 2.00E+00 |
| GO:0042832~defense response to protozoan                          | 1.20  | 2.05E+00 |
| GO:0016265~death                                                  | 7.23  | 2.57E+00 |
| GO:0051090~regulation of transcription factor activity            | 2.41  | 2.72E+00 |
| GO:0007242~intracellular signaling cascade                        | 10.44 | 2.89E+00 |
| GO:0045089~positive regulation of innate immune response          | 2.01  | 2.94E+00 |
| GO:0010647~positive regulation of cell communication              | 4.02  | 2.98E+00 |
| GO:0001892~embryonic placenta development                         | 2.41  | 3.15E+00 |
| GO:0051098~regulation of binding                                  | 2.81  | 3.29E+00 |
| GO:0070391~response to lipoteichoic acid                          | 1.20  | 3.37E+00 |
| GO:0032755~positive regulation of interleukin-6 production        | 1.61  | 3.47E+00 |
| GO:0030334~regulation of cell migration                           | 2.81  | 3.67E+00 |
| GO:0060341~regulation of cellular localization                    | 3.61  | 4.06E+00 |
| GO:0043122~regulation of I-kappaB kinase/NF-kappaB cascade        | 2.01  | 4.33E+00 |
| GO:0051252~regulation of RNA metabolic process                    | 14.46 | 4.66E+00 |
| GO:0033138~positive regulation of peptidyl-serine phosphorylation | 1.20  | 4.97E+00 |
| GO:0008283~cell proliferation                                     | 4.42  | 5.48E+00 |
| GO:0001816~cytokine production                                    | 2.01  | 5.62E+00 |
| GO:0043086~negative regulation of catalytic activity              | 2.81  | 5.80E+00 |
| GO:0043433~negative regulation of transcription factor activity   | 1.61  | 6.19E+00 |
| GO:0032101~regulation of response to external stimulus            | 2.81  | 6.37E+00 |
| GO:0006355~regulation of transcription, DNA-dependent             | 14.06 | 6.60E+00 |
| GO:0051094~positive regulation of developmental process           | 4.02  | 6.69E+00 |
| GO:0001562~response to protozoan                                  | 1.20  | 6.82E+00 |
| GO:0070230~positive regulation of lymphocyte apoptosis            | 1.20  | 6.82E+00 |
| GO:0050766~positive regulation of phagocytosis                    | 1.61  | 7.02E+00 |
| GO:0045088~regulation of innate immune response                   | 2.01  | 7.13E+00 |
| GO:0051101~regulation of DNA binding                              | 2.41  | 7.19E+00 |
| GO:0051270~regulation of cell motion                              | 2.81  | 7.63E+00 |
| GO:0002521~leukocyte differentiation                              | 3.21  | 7.67E+00 |
| GO:0001818~negative regulation of cytokine production             | 1.61  | 7.90E+00 |
| GO:0040012~regulation of locomotion                               | 2.81  | 8.68E+00 |
| GO:0050764~regulation of phagocytosis                             | 1.61  | 8.84E+00 |
| GO:0006909~phagocytosis                                           | 2.01  | 8.87E+00 |
| GO:0048584~positive regulation of response to stimulus            | 3.61  | 9.45E+00 |
| GO:0043392~negative regulation of DNA binding                     | 1.61  | 9.84E+00 |
| GO:0033673~negative regulation of kinase activity                 | 2.01  | 1.02E+01 |
| GO:0006469~negative regulation of protein kinase activity         | 2.01  | 1.02E+01 |

|                                                                                                                                      |       |          |
|--------------------------------------------------------------------------------------------------------------------------------------|-------|----------|
| GO:0051348~negative regulation of transferase activity                                                                               | 2.01  | 1.16E+01 |
| GO:0002460~adaptive immune response based on somatic recombination of immune receptors built from immunoglobulin superfamily domains | 2.41  | 1.20E+01 |
| GO:0002250~adaptive immune response                                                                                                  | 2.41  | 1.20E+01 |
| GO:0050865~regulation of cell activation                                                                                             | 3.21  | 1.24E+01 |
| GO:0043066~negative regulation of apoptosis                                                                                          | 4.02  | 1.32E+01 |
| GO:0048514~blood vessel morphogenesis                                                                                                | 3.61  | 1.33E+01 |
| GO:0001932~regulation of protein amino acid phosphorylation                                                                          | 2.81  | 1.33E+01 |
| GO:0001890~placenta development                                                                                                      | 2.41  | 1.37E+01 |
| GO:0042116~macrophage activation                                                                                                     | 1.20  | 1.37E+01 |
| GO:0031349~positive regulation of defense response                                                                                   | 2.01  | 1.47E+01 |
| GO:0043069~negative regulation of programmed cell death                                                                              | 4.02  | 1.48E+01 |
| GO:0060548~negative regulation of cell death                                                                                         | 4.02  | 1.50E+01 |
| GO:0002252~immune effector process                                                                                                   | 2.81  | 1.59E+01 |
| GO:0033135~regulation of peptidyl-serine phosphorylation                                                                             | 1.20  | 1.64E+01 |
| GO:0032642~regulation of chemokine production                                                                                        | 1.20  | 1.64E+01 |
| GO:0043068~positive regulation of programmed cell death                                                                              | 4.02  | 1.70E+01 |
| GO:0010942~positive regulation of cell death                                                                                         | 4.02  | 1.78E+01 |
| GO:0009968~negative regulation of signal transduction                                                                                | 3.21  | 1.91E+01 |
| GO:0051050~positive regulation of transport                                                                                          | 2.81  | 1.93E+01 |
| GO:0045807~positive regulation of endocytosis                                                                                        | 1.61  | 1.97E+01 |
| GO:0001525~angiogenesis                                                                                                              | 2.81  | 1.99E+01 |
| GO:0042035~regulation of cytokine biosynthetic process                                                                               | 2.01  | 2.11E+01 |
| GO:0060711~labyrinthine layer development                                                                                            | 1.61  | 2.12E+01 |
| GO:0050731~positive regulation of peptidyl-tyrosine phosphorylation                                                                  | 1.61  | 2.12E+01 |
| GO:0006873~cellular ion homeostasis                                                                                                  | 4.02  | 2.15E+01 |
| GO:0032651~regulation of interleukin-1 beta production                                                                               | 1.20  | 2.21E+01 |
| GO:0045892~negative regulation of transcription, DNA-dependent                                                                       | 4.42  | 2.22E+01 |
| GO:0051253~negative regulation of RNA metabolic process                                                                              | 4.42  | 2.31E+01 |
| GO:0050867~positive regulation of cell activation                                                                                    | 2.41  | 2.36E+01 |
| GO:0030198~extracellular matrix organization                                                                                         | 2.41  | 2.36E+01 |
| GO:0001701~in utero embryonic development                                                                                            | 4.02  | 2.42E+01 |
| GO:0055082~cellular chemical homeostasis                                                                                             | 4.02  | 2.46E+01 |
| GO:0032652~regulation of interleukin-1 production                                                                                    | 1.20  | 2.50E+01 |
| GO:0070228~regulation of lymphocyte apoptosis                                                                                        | 1.20  | 2.50E+01 |
| GO:0002286~T cell activation during immune response                                                                                  | 1.20  | 2.50E+01 |
| GO:0007159~leukocyte adhesion                                                                                                        | 1.20  | 2.50E+01 |
| GO:0045449~regulation of transcription                                                                                               | 18.07 | 2.75E+01 |
| GO:0045859~regulation of protein kinase activity                                                                                     | 3.21  | 2.77E+01 |
| GO:0010648~negative regulation of cell communication                                                                                 | 3.21  | 2.77E+01 |
| GO:0032655~regulation of interleukin-12 production                                                                                   | 1.20  | 2.81E+01 |
| GO:0010558~negative regulation of macromolecule biosynthetic process                                                                 | 5.22  | 2.81E+01 |

|                                                                                     |      |          |
|-------------------------------------------------------------------------------------|------|----------|
| GO:0000122~negative regulation of transcription from RNA polymerase II promoter     | 3.61 | 2.86E+01 |
| GO:0045087~innate immune response                                                   | 2.41 | 2.87E+01 |
| GO:0048534~hemopoietic or lymphoid organ development                                | 4.02 | 3.11E+01 |
| GO:0046330~positive regulation of JNK cascade                                       | 1.20 | 3.12E+01 |
| GO:0070304~positive regulation of stress-activated protein kinase signaling pathway | 1.20 | 3.12E+01 |
| GO:0007169~transmembrane receptor protein tyrosine kinase signaling pathway         | 3.21 | 3.13E+01 |
| GO:0043549~regulation of kinase activity                                            | 3.21 | 3.13E+01 |
| GO:0007243~protein kinase cascade                                                   | 3.61 | 3.14E+01 |
| GO:0031327~negative regulation of cellular biosynthetic process                     | 5.22 | 3.31E+01 |
| GO:0030217~T cell differentiation                                                   | 2.01 | 3.43E+01 |
| GO:0045766~positive regulation of angiogenesis                                      | 1.20 | 3.43E+01 |
| GO:0060713~labyrinthine layer morphogenesis                                         | 1.20 | 3.43E+01 |
| GO:0009620~response to fungus                                                       | 1.20 | 3.43E+01 |
| GO:0006468~protein amino acid phosphorylation                                       | 6.83 | 3.44E+01 |
| GO:0048568~embryonic organ development                                              | 3.61 | 3.46E+01 |
| GO:0009890~negative regulation of biosynthetic process                              | 5.22 | 3.48E+01 |
| GO:0051338~regulation of transferase activity                                       | 3.21 | 3.65E+01 |
| GO:0042110~T cell activation                                                        | 2.41 | 3.70E+01 |
| GO:0060674~placenta blood vessel development                                        | 1.20 | 3.74E+01 |
| GO:0050801~ion homeostasis                                                          | 4.02 | 3.76E+01 |
| GO:0019725~cellular homeostasis                                                     | 4.42 | 3.85E+01 |
| GO:0002268~follicular dendritic cell differentiation                                | 0.80 | 3.87E+01 |
| GO:0007263~nitric oxide mediated signal transduction                                | 0.80 | 3.87E+01 |
| GO:0002266~follicular dendritic cell activation                                     | 0.80 | 3.87E+01 |
| GO:0070163~regulation of adiponectin secretion                                      | 0.80 | 3.87E+01 |
| GO:0002688~regulation of leukocyte chemotaxis                                       | 0.80 | 3.87E+01 |
| GO:0002752~cell surface pattern recognition receptor signaling pathway              | 0.80 | 3.87E+01 |
| GO:0045835~negative regulation of meiosis                                           | 0.80 | 3.87E+01 |
| GO:0042503~tyrosine phosphorylation of Stat3 protein                                | 0.80 | 3.87E+01 |
| GO:0002520~immune system development                                                | 4.02 | 3.88E+01 |
| GO:0043065~positive regulation of apoptosis                                         | 3.61 | 3.88E+01 |
| GO:0002526~acute inflammatory response                                              | 2.01 | 4.04E+01 |
| GO:0045428~regulation of nitric oxide biosynthetic process                          | 1.20 | 4.05E+01 |
| GO:0002285~lymphocyte activation during immune response                             | 1.20 | 4.05E+01 |
| GO:0046632~alpha-beta T cell differentiation                                        | 1.20 | 4.05E+01 |
| GO:0030097~hemopoiesis                                                              | 3.61 | 4.08E+01 |
| GO:0002757~immune response-activating signal transduction                           | 1.61 | 4.25E+01 |
| GO:0051130~positive regulation of cellular component organization                   | 2.41 | 4.28E+01 |
| GO:0031399~regulation of protein modification process                               | 2.81 | 4.37E+01 |
| GO:0010605~negative regulation of macromolecule metabolic process                   | 5.62 | 4.40E+01 |
| GO:0043281~regulation of caspase activity                                           | 1.61 | 4.59E+01 |

|                                                                                          |      |          |
|------------------------------------------------------------------------------------------|------|----------|
| GO:0052548~regulation of endopeptidase activity                                          | 1.61 | 4.59E+01 |
| GO:0010553~negative regulation of specific transcription from RNA polymerase II promoter | 1.20 | 4.67E+01 |
| GO:0052547~regulation of peptidase activity                                              | 1.61 | 4.77E+01 |
| GO:0032147~activation of protein kinase activity                                         | 1.61 | 4.77E+01 |
| GO:0045637~regulation of myeloid cell differentiation                                    | 1.61 | 4.77E+01 |
| GO:0030100~regulation of endocytosis                                                     | 1.61 | 4.94E+01 |
| GO:0002764~immune response-regulating signal transduction                                | 1.61 | 4.94E+01 |
| GO:0007611~learning or memory                                                            | 2.01 | 5.02E+01 |
| GO:0045321~leukocyte activation                                                          | 3.21 | 5.05E+01 |
| GO:0048878~chemical homeostasis                                                          | 4.42 | 5.06E+01 |
| GO:0050730~regulation of peptidyl-tyrosine phosphorylation                               | 1.61 | 5.11E+01 |
| GO:0008228~opsonization                                                                  | 0.80 | 5.20E+01 |
| GO:0007260~tyrosine phosphorylation of STAT protein                                      | 0.80 | 5.20E+01 |
| GO:0002238~response to molecule of fungal origin                                         | 0.80 | 5.20E+01 |
| GO:0060708~spongiotrophoblast differentiation                                            | 0.80 | 5.20E+01 |
| GO:0010572~positive regulation of platelet activation                                    | 0.80 | 5.20E+01 |
| GO:0010543~regulation of platelet activation                                             | 0.80 | 5.20E+01 |
| GO:0010273~detoxification of copper ion                                                  | 0.80 | 5.20E+01 |
| GO:0002367~cytokine production during immune response                                    | 0.80 | 5.20E+01 |
| GO:0046631~alpha-beta T cell activation                                                  | 1.20 | 5.26E+01 |
| GO:0032582~negative regulation of gene-specific transcription                            | 1.20 | 5.26E+01 |
| GO:0031099~regeneration                                                                  | 1.20 | 5.26E+01 |
| GO:0043009~chordate embryonic development                                                | 4.82 | 5.32E+01 |
| GO:0016481~negative regulation of transcription                                          | 4.42 | 5.49E+01 |
| GO:0009792~embryonic development ending in birth or egg hatching                         | 4.82 | 5.51E+01 |
| GO:0007167~enzyme linked receptor protein signaling pathway                              | 3.61 | 5.55E+01 |
| GO:0019221~cytokine-mediated signaling pathway                                           | 1.61 | 5.61E+01 |
| GO:0001934~positive regulation of protein amino acid phosphorylation                     | 1.61 | 5.61E+01 |
| GO:0050778~positive regulation of immune response                                        | 2.41 | 5.66E+01 |
| GO:0051092~positive regulation of NF-kappaB transcription factor activity                | 1.20 | 5.82E+01 |
| GO:0050673~epithelial cell proliferation                                                 | 1.20 | 6.08E+01 |
| GO:0046635~positive regulation of alpha-beta T cell activation                           | 1.20 | 6.08E+01 |
| GO:0042327~positive regulation of phosphorylation                                        | 1.61 | 6.24E+01 |
| GO:0002281~macrophage activation during immune response                                  | 0.80 | 6.24E+01 |
| GO:0010574~regulation of vascular endothelial growth factor production                   | 0.80 | 6.24E+01 |
| GO:0070423~nucleotide-binding oligomerization domain containing signaling pathway        | 0.80 | 6.24E+01 |
| GO:0002220~innate immune response activating cell surface receptor signaling pathway     | 0.80 | 6.24E+01 |
| GO:0070431~nucleotide-binding oligomerization domain containing 2 signaling pathway      | 0.80 | 6.24E+01 |
| GO:0032695~negative regulation of interleukin-12 production                              | 0.80 | 6.24E+01 |
| GO:0001660~fever                                                                         | 0.80 | 6.24E+01 |

|                                                                                                         |      |          |
|---------------------------------------------------------------------------------------------------------|------|----------|
| GO:0033627~cell adhesion mediated by integrin                                                           | 0.80 | 6.24E+01 |
| GO:0006927~transformed cell apoptosis                                                                   | 0.80 | 6.24E+01 |
| GO:0010575~positive regulation vascular endothelial growth factor production                            | 0.80 | 6.24E+01 |
| GO:0016337~cell-cell adhesion                                                                           | 3.21 | 6.27E+01 |
| GO:0032270~positive regulation of cellular protein metabolic process                                    | 2.01 | 6.33E+01 |
| GO:0051249~regulation of lymphocyte activation                                                          | 2.41 | 6.41E+01 |
| GO:0016310~phosphorylation                                                                              | 6.83 | 6.44E+01 |
| GO:0045937~positive regulation of phosphate metabolic process                                           | 1.61 | 6.54E+01 |
| GO:0010562~positive regulation of phosphorus metabolic process                                          | 1.61 | 6.54E+01 |
| GO:0045934~negative regulation of nucleobase, nucleoside, nucleotide and nucleic acid metabolic process | 4.42 | 6.73E+01 |
| GO:0043062~extracellular structure organization                                                         | 2.41 | 6.85E+01 |
| GO:0051172~negative regulation of nitrogen compound metabolic process                                   | 4.42 | 6.97E+01 |
| GO:0050708~regulation of protein secretion                                                              | 1.20 | 7.04E+01 |
| GO:0007422~peripheral nervous system development                                                        | 1.20 | 7.04E+01 |
| GO:0032495~response to muramyl dipeptide                                                                | 0.80 | 7.06E+01 |
| GO:0042093~T-helper cell differentiation                                                                | 0.80 | 7.06E+01 |
| GO:0002294~CD4-positive, alpha-beta T cell differentiation during immune response                       | 0.80 | 7.06E+01 |
| GO:0006828~manganese ion transport                                                                      | 0.80 | 7.06E+01 |
| GO:0002904~positive regulation of B cell apoptosis                                                      | 0.80 | 7.06E+01 |
| GO:0030003~cellular cation homeostasis                                                                  | 2.41 | 7.10E+01 |
| GO:0032583~regulation of gene-specific transcription                                                    | 1.61 | 7.23E+01 |
| GO:0002694~regulation of leukocyte activation                                                           | 2.41 | 7.26E+01 |
| GO:0051247~positive regulation of protein metabolic process                                             | 2.01 | 7.28E+01 |
| GO:0010629~negative regulation of gene expression                                                       | 4.42 | 7.43E+01 |
| GO:0044093~positive regulation of molecular function                                                    | 3.61 | 7.43E+01 |
| GO:0032649~regulation of interferon-gamma production                                                    | 1.20 | 7.46E+01 |
| GO:0006793~phosphorus metabolic process                                                                 | 7.63 | 7.57E+01 |
| GO:0006796~phosphate metabolic process                                                                  | 7.63 | 7.57E+01 |
| GO:0043123~positive regulation of I-kappaB kinase/NF-kappaB cascade                                     | 1.20 | 7.65E+01 |
| GO:0002467~germinal center formation                                                                    | 0.80 | 7.70E+01 |
| GO:0001878~response to yeast                                                                            | 0.80 | 7.70E+01 |
| GO:0045123~cellular extravasation                                                                       | 0.80 | 7.70E+01 |
| GO:0021783~preganglionic parasympathetic nervous system development                                     | 0.80 | 7.70E+01 |
| GO:0002292~T cell differentiation during immune response                                                | 0.80 | 7.70E+01 |
| GO:0002293~alpha-beta T cell differentiation during immune response                                     | 0.80 | 7.70E+01 |
| GO:0060707~trophoblast giant cell differentiation                                                       | 0.80 | 7.70E+01 |
| GO:0030098~lymphocyte differentiation                                                                   | 2.01 | 7.74E+01 |
| GO:0046634~regulation of alpha-beta T cell activation                                                   | 1.20 | 7.83E+01 |
| GO:0002573~myeloid leukocyte differentiation                                                            | 1.20 | 7.83E+01 |
| GO:0051091~positive regulation of transcription factor activity                                         | 1.20 | 7.83E+01 |
| GO:0042692~muscle cell differentiation                                                                  | 2.01 | 7.99E+01 |

|                                                                                   |       |          |
|-----------------------------------------------------------------------------------|-------|----------|
| GO:0002274~myeloid leukocyte activation                                           | 1.20  | 8.00E+01 |
| GO:0051222~positive regulation of protein transport                               | 1.20  | 8.16E+01 |
| GO:0050716~positive regulation of interleukin-1 secretion                         | 0.80  | 8.20E+01 |
| GO:0050706~regulation of interleukin-1 beta secretion                             | 0.80  | 8.20E+01 |
| GO:0002456~T cell mediated immunity                                               | 0.80  | 8.20E+01 |
| GO:0032731~positive regulation of interleukin-1 beta production                   | 0.80  | 8.20E+01 |
| GO:0031649~heat generation                                                        | 0.80  | 8.20E+01 |
| GO:0048486~parasympathetic nervous system development                             | 0.80  | 8.20E+01 |
| GO:0060664~epithelial cell proliferation involved in salivary gland morphogenesis | 0.80  | 8.20E+01 |
| GO:0045073~regulation of chemokine biosynthetic process                           | 0.80  | 8.20E+01 |
| GO:0050994~regulation of lipid catabolic process                                  | 0.80  | 8.20E+01 |
| GO:0002287~alpha-beta T cell activation during immune response                    | 0.80  | 8.20E+01 |
| GO:0046688~response to copper ion                                                 | 0.80  | 8.20E+01 |
| GO:0046627~negative regulation of insulin receptor signaling pathway              | 0.80  | 8.20E+01 |
| GO:0043901~negative regulation of multi-organism process                          | 0.80  | 8.20E+01 |
| GO:0002224~toll-like receptor signaling pathway                                   | 0.80  | 8.20E+01 |
| GO:0050704~regulation of interleukin-1 secretion                                  | 0.80  | 8.20E+01 |
| GO:0006882~cellular zinc ion homeostasis                                          | 0.80  | 8.20E+01 |
| GO:0050718~positive regulation of interleukin-1 beta secretion                    | 0.80  | 8.20E+01 |
| GO:0043903~regulation of symbiosis, encompassing mutualism through parasitism     | 0.80  | 8.20E+01 |
| GO:0046697~decidualization                                                        | 0.80  | 8.20E+01 |
| GO:0032732~positive regulation of interleukin-1 production                        | 0.80  | 8.20E+01 |
| GO:0002449~lymphocyte mediated immunity                                           | 1.61  | 8.25E+01 |
| GO:0044421~extracellular region part                                              | 14.46 | 6.14E-12 |
| GO:0005615~extracellular space                                                    | 11.24 | 7.60E-11 |
| GO:0005576~extracellular region                                                   | 18.47 | 1.06E-07 |
| GO:0009986~cell surface                                                           | 5.22  | 3.25E-04 |
| GO:0005578~proteinaceous extracellular matrix                                     | 4.42  | 3.24E-03 |
| GO:0009897~external side of plasma membrane                                       | 3.61  | 3.53E-03 |
| GO:0031012~extracellular matrix                                                   | 4.42  | 4.28E-03 |
| GO:0005886~plasma membrane                                                        | 20.08 | 5.89E-03 |
| GO:0030659~cytoplasmic vesicle membrane                                           | 2.01  | 2.10E-02 |
| GO:0031982~vesicle                                                                | 5.22  | 2.33E-02 |
| GO:0044433~cytoplasmic vesicle part                                               | 2.01  | 2.79E-02 |
| GO:0012506~vesicle membrane                                                       | 2.01  | 2.98E-02 |
| GO:0030141~secretory granule                                                      | 2.01  | 5.32E-02 |
| GO:0005604~basement membrane                                                      | 1.61  | 5.82E-02 |
| GO:0030670~phagocytic vesicle membrane                                            | 0.80  | 7.03E-02 |
| GO:0045121~membrane raft                                                          | 1.61  | 8.35E-02 |
| GO:0031410~cytoplasmic vesicle                                                    | 4.42  | 8.79E-02 |
| GO:0005125~cytokine activity                                                      | 6.83  | 3.02E-09 |
| GO:0030246~carbohydrate binding                                                   | 7.63  | 3.26E-07 |
| GO:0008009~chemokine activity                                                     | 3.21  | 6.84E-07 |



|                                                                                |       |          |
|--------------------------------------------------------------------------------|-------|----------|
| GO:0042379~chemokine receptor binding                                          | 3.21  | 8.25E-07 |
| GO:0030247~polysaccharide binding                                              | 4.02  | 6.28E-05 |
| GO:0001871~pattern binding                                                     | 4.02  | 6.28E-05 |
| GO:0005149~interleukin-1 receptor binding                                      | 1.61  | 6.43E-04 |
| GO:0005529~sugar binding                                                       | 4.02  | 8.36E-04 |
| GO:0004222~metalloendopeptidase activity                                       | 3.21  | 9.37E-04 |
| GO:0005539~glycosaminoglycan binding                                           | 3.21  | 9.37E-04 |
| GO:0019955~cytokine binding                                                    | 2.81  | 1.26E-03 |
| GO:0043565~sequence-specific DNA binding                                       | 7.23  | 1.55E-03 |
| GO:0008083~growth factor activity                                              | 3.21  | 3.17E-03 |
| GO:0030528~transcription regulator activity                                    | 11.65 | 3.58E-03 |
| GO:0003700~transcription factor activity                                       | 8.43  | 4.51E-03 |
| GO:0008201~heparin binding                                                     | 2.41  | 5.47E-03 |
| GO:0004896~cytokine receptor activity                                          | 2.01  | 6.61E-03 |
| GO:0008237~metallopeptidase activity                                           | 3.21  | 1.42E-02 |
| GO:0008528~peptide receptor activity, G-protein coupled                        | 2.41  | 1.72E-02 |
| GO:0001653~peptide receptor activity                                           | 2.41  | 1.72E-02 |
| GO:0015294~solute:cation symporter activity                                    | 2.01  | 1.75E-02 |
| GO:0046983~protein dimerization activity                                       | 4.42  | 1.81E-02 |
| GO:0015293~symporter activity                                                  | 2.41  | 3.44E-02 |
| GO:0004950~chemokine receptor activity                                         | 1.20  | 3.57E-02 |
| GO:0019956~chemokine binding                                                   | 1.20  | 3.87E-02 |
| GO:0001872~zymosan binding                                                     | 0.80  | 4.03E-02 |
| GO:0046915~transition metal ion transmembrane transporter activity             | 1.20  | 4.19E-02 |
| GO:0004857~enzyme inhibitor activity                                           | 3.21  | 4.86E-02 |
| GO:0005384~manganese ion transmembrane transporter activity                    | 0.80  | 5.34E-02 |
| GO:0003677~DNA binding                                                         | 13.25 | 5.98E-02 |
| GO:0042277~peptide binding                                                     | 2.41  | 6.78E-02 |
| GO:0004866~endopeptidase inhibitor activity                                    | 2.41  | 6.92E-02 |
| GO:0015082~di-, tri-valent inorganic cation transmembrane transporter activity | 1.20  | 7.01E-02 |
| GO:0019838~growth factor binding                                               | 1.61  | 7.50E-02 |
| GO:0046982~protein heterodimerization activity                                 | 2.01  | 8.34E-02 |
| GO:0004908~interleukin-1 receptor activity                                     | 0.80  | 9.16E-02 |
| GO:0019966~interleukin-1 binding                                               | 0.80  | 9.16E-02 |
| GO:0030414~peptidase inhibitor activity                                        | 2.41  | 9.29E-02 |
| <b>Enriched KEGG Categories</b>                                                |       |          |
| mmu04621:NOD-like receptor signaling pathway                                   | 5.22  | 1.77E-10 |
| mmu04060:Cytokine-cytokine receptor interaction                                | 8.43  | 1.14E-09 |
| mmu04620:Toll-like receptor signaling pathway                                  | 5.22  | 4.65E-08 |
| mmu04010:MAPK signaling pathway                                                | 7.23  | 8.61E-07 |
| mmu04640:Hematopoietic cell lineage                                            | 4.02  | 7.08E-06 |
| mmu04630:Jak-STAT signaling pathway                                            | 4.82  | 2.95E-05 |
| mmu04062:Chemokine signaling pathway                                           | 5.22  | 3.18E-05 |
| mmu05200:Pathways in cancer                                                    | 6.43  | 1.84E-04 |

|                                                    |      |          |
|----------------------------------------------------|------|----------|
| mmu05222:Small cell lung cancer                    | 2.81 | 2.41E-03 |
| mmu04012:ErbB signaling pathway                    | 2.41 | 1.31E-02 |
| mmu04210:Apoptosis                                 | 2.41 | 1.31E-02 |
| mmu05332:Graft-versus-host disease                 | 2.01 | 1.41E-02 |
| mmu04510:Focal adhesion                            | 3.61 | 1.45E-02 |
| mmu05020:Prion diseases                            | 1.61 | 1.86E-02 |
| mmu04115:p53 signaling pathway                     | 2.01 | 2.51E-02 |
| mmu05219:Bladder cancer                            | 1.61 | 3.00E-02 |
| mmu04960:Aldosterone-regulated sodium reabsorption | 1.61 | 3.00E-02 |
| mmu04660:T cell receptor signaling pathway         | 2.41 | 4.19E-02 |
| mmu04930:Type II diabetes mellitus                 | 1.61 | 4.44E-02 |
| mmu04512:ECM-receptor interaction                  | 2.01 | 4.51E-02 |
| mmu04623:Cytosolic DNA-sensing pathway             | 1.61 | 5.91E-02 |
| mmu04666:Fc gamma R-mediated phagocytosis          | 2.01 | 7.40E-02 |
| mmu04940:Type I diabetes mellitus                  | 1.61 | 8.17E-02 |
| mmu04920:Adipocytokine signaling pathway           | 1.61 | 9.42E-02 |
