# Supplementary material for: Concurrent Host-Pathogen Transcriptional Responses in a Clostridium perfringens Murine Myonecrosis Infection
Source: PubMed Central journal article supplement (PMC5874911; doi:10.1128/mbio.00473-18), 2018-03-27
Supplement: mbo002183811st3.pdf [file mbo002183811st3.pdf]

**TABLE S3** Differentially expressed genes in *C. perfringens* cells grown *in vivo* compared to *in vitro*.

| Locus Tag <sup>a</sup> | Log <sub>2</sub> (fold Change) | FDR      | Gene <sup>b</sup> | Putative Product                                     |
|------------------------|--------------------------------|----------|-------------------|------------------------------------------------------|
| CPE0489                | 7.70                           | 8.32E-07 | <i>pscX</i>       | flippase                                             |
| CPE1182                | 6.82                           | 4.37E-05 |                   | aspartate carbamoyltransferase regulatory subunit    |
| CPE2250                | 6.25                           | 7.28E-05 |                   | hypothetical protein                                 |
| CPE0690                | 6.15                           | 4.66E-06 | <i>argH</i>       | argininosuccinate lyase                              |
| CPE1183                | 5.85                           | 3.79E-06 | <i>pyrB</i>       | aspartate carbamoyltransferase                       |
| CPE1616                | 5.37                           | 1.27E-04 |                   | hypothetical protein                                 |
| CPE2274                | 5.31                           | 3.22E-05 | <i>narK</i>       | nitrate extrusion protein                            |
| CPE2563                | 5.30                           | 1.01E-03 |                   | Ser-type protease                                    |
| CPE1858                | 5.26                           | 1.31E-06 |                   | cell division protein FtsQ                           |
| PCP12                  | 5.21                           | 3.22E-05 |                   | hypothetical protein                                 |
| CPE2573                | 5.17                           | 1.49E-04 | <i>carA</i>       | carbamoyl phosphate synthase small subunit           |
| CPE1177                | 5.09                           | 4.92E-06 | <i>pyrE</i>       | orotate phosphoribosyltransferase                    |
| CPE2135                | 5.04                           | 2.51E-05 |                   | hypothetical protein                                 |
| CPE0747                | 5.03                           | 4.66E-05 |                   | hypothetical protein                                 |
| CPE0155                | 5.02                           | 2.57E-04 |                   | hypothetical protein                                 |
| CPE1181                | 4.93                           | 1.39E-05 | <i>pyrC</i>       | dihydroorotase, multifunctional complex type         |
| CPE1410                | 4.92                           | 7.22E-05 |                   | Na-translocating NADH-quinone reductase Nqr2 subunit |
| CPE1480                | 4.71                           | 1.02E-04 |                   | sulfate permease, SulP family                        |
| PCP10                  | 4.64                           | 2.47E-04 |                   | transposase                                          |
| CPE0465                | 4.53                           | 2.46E-04 |                   | hypothetical protein                                 |
| CPE0369                | 4.52                           | 9.61E-05 |                   | hypothetical protein                                 |
| CPE0276                | 4.44                           | 2.59E-03 |                   | hydrogenase                                          |
| CPE2572                | 4.42                           | 7.08E-06 | <i>carB</i>       | carbamoyl phosphate synthase large subunit           |
| CPE0713                | 4.40                           | 1.28E-04 |                   | hypothetical protein                                 |
| CPE2223                | 4.39                           | 2.32E-04 |                   | mannosyltransferase                                  |
| CPE1388                | 4.36                           | 1.64E-03 |                   | hypothetical protein                                 |
| CPE0809                | 4.36                           | 4.12E-07 |                   | vancomycin high temperature exclusion protein        |
| CPE0156                | 4.30                           | 1.24E-03 |                   | surface protein                                      |
| CPE2359                | 4.30                           | 8.77E-07 | <i>rpsD</i>       | 30S ribosomal protein S4                             |
| CPE0382                | 4.28                           | 9.08E-04 |                   | autolytic lysozyme                                   |
| CPE1609                | 4.28                           | 4.40E-04 |                   | hypothetical protein                                 |
| CPE1799                | 4.27                           | 2.45E-03 |                   | FAD dependent oxidoreductase                         |
| CPE2179                | 4.27                           | 1.98E-04 |                   | sporulation protein YyaC                             |
| CPE0066                | 4.25                           | 4.14E-03 |                   | amylopullulanase                                     |
| CPE2157                | 4.19                           | 9.93E-03 |                   | PTS system, glucose-specific IIBC component          |
| CPE1903                | 4.17                           | 1.94E-04 |                   | small acid-soluble spore protein beta                |
| PCP20                  | 4.16                           | 3.80E-04 |                   | hypothetical protein                                 |
| CPE0227                | 4.15                           | 1.93E-03 |                   | ABC transporter                                      |

|         |      |          |                |                                                     |
|---------|------|----------|----------------|-----------------------------------------------------|
| CPE0965 | 4.13 | 3.10E-04 |                | GGDEF domain protein                                |
| CPE1359 | 4.09 | 3.10E-04 |                | hypothetical protein                                |
| CPE1133 | 4.08 | 5.36E-03 |                | choline binding protein                             |
| CPE1809 | 4.08 | 3.05E-04 | <i>spolIM</i>  | stage II sporulation protein M                      |
| CPE2046 | 4.08 | 5.97E-03 | <i>spoVAD</i>  | stage V sporulation protein AD                      |
| CPE0648 | 4.08 | 3.56E-03 | <i>gerKA</i>   | spore germination protein KA                        |
| CPE1178 | 4.07 | 8.34E-05 | <i>pyrD</i>    | dihydroorotate dehydrogenase 1B                     |
| CPE1138 | 4.07 | 6.39E-04 |                | hypothetical protein                                |
| CPE1559 | 4.05 | 2.34E-04 |                | diapophytoene dehydrogenase                         |
| CPE1586 | 4.05 | 2.69E-04 |                | hypothetical protein                                |
| SR93    | 4.02 | 5.02E-04 |                | Region between CPE2632 and CPE2633                  |
| CPE1769 | 4.00 | 1.71E-03 | <i>spoVD</i>   | stage V sporulation protein D                       |
| CPE0192 | 4.00 | 6.91E-04 | <i>cbiM</i>    | cobalt transport protein CbiM                       |
| CPE0241 | 3.99 | 1.13E-03 |                | flagellar motor protein MotB                        |
| CPE1125 | 3.98 | 7.76E-03 |                | hypothetical protein                                |
| CPE1377 | 3.97 | 1.09E-06 |                | hypothetical protein                                |
| CPE2561 | 3.95 | 9.11E-03 |                | Ser-type protease                                   |
| CPE1095 | 3.94 | 1.15E-03 |                | integrase/recombinase                               |
| CPE2213 | 3.90 | 4.68E-04 | <i>cphA</i>    | cyanophycin synthetase                              |
| PCP05   | 3.89 | 2.75E-03 |                | transposase                                         |
| CPE0797 | 3.88 | 1.53E-04 |                | PAP2 family protein                                 |
| CPE0223 | 3.88 | 3.31E-03 |                | ferrichrome ABC transporter                         |
| CPE0938 | 3.88 | 1.08E-03 |                | putative sulfite oxidase subunit YedZ               |
| CPE0117 | 3.87 | 4.40E-06 |                | hypothetical protein                                |
| CPE1648 | 3.87 | 5.17E-04 | <i>spoVB</i>   | stage V sporulation protein B                       |
| CPE0643 | 3.83 | 1.92E-06 |                | hypothetical protein                                |
| CPE0397 | 3.80 | 8.45E-06 | <i>uapC</i>    | transporter                                         |
| CPE2558 | 3.79 | 2.76E-03 |                | hypothetical protein                                |
| CPE1829 | 3.78 | 5.65E-03 | <i>spolIAE</i> | stage III sporulation protein AE                    |
| CPE0517 | 3.77 | 1.36E-03 |                | von Willebrand factor A                             |
| CPE1620 | 3.77 | 7.92E-04 |                | hypothetical protein                                |
| CPE2611 | 3.76 | 6.30E-03 |                | peptidase, M23/M37 family                           |
| CPE0601 | 3.75 | 1.33E-03 |                | amino acid ABC transporter                          |
| CPE0728 | 3.75 | 1.68E-03 |                | short chain dehydrogenase                           |
| CPE2041 | 3.74 | 2.48E-03 | <i>gpr</i>     | germination protease                                |
| CPE1578 | 3.74 | 4.74E-03 |                | ABC transporter                                     |
| CPE1843 | 3.74 | 6.30E-04 | <i>pilC</i>    | fimbrial assembly protein                           |
| CPE2458 | 3.73 | 6.68E-03 |                | L,D-carboxypeptidase A                              |
| CPE2580 | 3.73 | 5.60E-03 |                | oxidoreductase, short chain dehydrogenase/reductase |
| CPE1190 | 3.73 | 1.37E-06 |                | inner membrane transporter YjeM                     |
| CPE1255 | 3.73 | 5.28E-03 | <i>hydG</i>    | ferredoxin-NADP reductase                           |
| CPE1814 | 3.73 | 3.75E-03 |                | stage IV sporulation protein B                      |
| CPE1956 | 3.72 | 7.15E-04 |                | GntR family transcriptional regulator               |
| CPE0429 | 3.71 | 1.15E-03 |                | hypothetical protein                                |

|         |      |          |                |                                                     |
|---------|------|----------|----------------|-----------------------------------------------------|
| CPE2214 | 3.71 | 8.20E-04 | <i>cphB</i>    | cyanophycinase                                      |
| CPE1800 | 3.70 | 4.09E-03 |                | dihydroorotate dehydrogenase electron transfer subu |
| CPE1062 | 3.67 | 2.05E-03 |                | electron transport complex protein RnfG             |
| CPE1254 | 3.67 | 5.86E-03 | <i>gltB</i>    | oxidoreductase                                      |
| CPE1649 | 3.65 | 1.18E-03 |                | hypothetical protein                                |
| CPE0691 | 3.64 | 1.18E-03 | <i>argG</i>    | argininosuccinate synthase                          |
| CPE1437 | 3.64 | 1.25E-04 | <i>hemA</i>    | glutamyl-tRNA reductase                             |
| CPE0222 | 3.64 | 3.00E-03 |                | sortase                                             |
| CPE1978 | 3.60 | 3.38E-05 | <i>asnA</i>    | asparagine synthetase AsnA                          |
| CPE1381 | 3.58 | 1.05E-03 |                | hypothetical protein                                |
| CPE2269 | 3.56 | 3.27E-06 | <i>appF</i>    | oligopeptide ABC transporter                        |
| CPE1600 | 3.55 | 5.18E-03 | <i>thiH</i>    | thiamine biosynthesis protein ThiH                  |
| CPE0221 | 3.54 | 7.71E-03 |                | iron transporter                                    |
| CPE1961 | 3.53 | 3.80E-04 |                | sporulation protein YunB                            |
| CPE0600 | 3.53 | 3.26E-03 |                | amino acid ABC transporter                          |
| CPE2545 | 3.52 | 3.05E-03 |                | hypothetical protein                                |
| CPE0832 | 3.51 | 3.44E-03 |                | hypothetical protein                                |
| CPE1180 | 3.49 | 1.01E-04 | <i>pyrF</i>    | orotidine 5'-phosphate decarboxylase                |
| CPE0370 | 3.47 | 5.99E-04 |                | transcriptional regulator                           |
| CPE1827 | 3.47 | 6.56E-03 | <i>spolIAG</i> | stage III sporulation protein AG                    |
| CPE1065 | 3.46 | 8.49E-03 |                | ferredoxin                                          |
| CPE1660 | 3.45 | 1.08E-06 | <i>feoB</i>    | ferrous iron transport protein B                    |
| CPE1282 | 3.44 | 1.48E-03 |                | transmembrane protein                               |
| CPE0186 | 3.44 | 1.39E-06 |                | putative transporter                                |
| CPE2527 | 3.43 | 2.40E-03 |                | hypothetical protein                                |
| CPE1409 | 3.41 | 3.62E-03 |                | electron transport complex protein RnfC             |
| CPE1579 | 3.41 | 2.14E-03 |                | ABC transporter                                     |
| CPE0190 | 3.41 | 1.50E-05 |                | hypothetical protein                                |
| CPE0464 | 3.40 | 6.85E-03 |                | spore coat polysaccharide biosynthesis protein      |
| CPE2631 | 3.39 | 7.71E-03 |                | PTS system protein                                  |
| CPE1134 | 3.39 | 9.51E-03 |                | hypothetical protein                                |
| CPE2273 | 3.39 | 2.87E-06 | <i>dppA</i>    | oligopeptide ABC transporter                        |
| CPE0940 | 3.39 | 1.99E-03 |                | hypothetical protein                                |
| CPE0124 | 3.38 | 1.45E-03 |                | hypothetical protein                                |
| PCP13   | 3.38 | 2.44E-03 |                | hypothetical protein                                |
| CPE2533 | 3.38 | 6.21E-03 | <i>spmA</i>    | spore maturation protein A                          |
| CPE0557 | 3.35 | 7.31E-05 |                | glycine betaine/carnitine/choline ABC transporter   |
| CPE2608 | 3.34 | 2.03E-03 |                | hypothetical protein                                |
| CPE0680 | 3.34 | 4.77E-04 | <i>purL</i>    | phosphoribosylformylglycinamide synthase            |
| CPE0235 | 3.33 | 1.91E-03 |                | sensor histidine kinase                             |
| CPE0685 | 3.33 | 5.17E-04 | <i>purN</i>    | phosphoribosylglycinamide formyltransferase         |
| CPE0945 | 3.32 | 1.16E-03 |                | hypothetical protein                                |
| CPE2270 | 3.30 | 7.37E-06 | <i>dppD</i>    | oligopeptide ABC transporter                        |
| CPE1612 | 3.29 | 2.04E-03 |                | hypothetical protein                                |

|         |      |          |               |                                                                                           |
|---------|------|----------|---------------|-------------------------------------------------------------------------------------------|
| CPE0891 | 3.29 | 2.80E-03 |               | hypothetical protein                                                                      |
| CPE0237 | 3.28 | 8.75E-03 | <i>napA</i>   | Na <sup>+</sup> /H <sup>+</sup> antiporter                                                |
| CPE1982 | 3.28 | 3.35E-03 |               | hypothetical protein                                                                      |
| CPE0684 | 3.28 | 2.36E-03 | <i>purM</i>   | phosphoribosylaminoimidazole synthetase                                                   |
| CPE1332 | 3.27 | 9.03E-03 | <i>spoVR</i>  | stage V sporulation protein R                                                             |
| CPE0220 | 3.27 | 6.77E-03 |               | hypothetical protein                                                                      |
| CPE0946 | 3.27 | 1.89E-03 |               | hypothetical protein                                                                      |
| CPE1781 | 3.27 | 2.48E-03 |               | pheromone autoinducer 2 transporter                                                       |
| CPE0921 | 3.26 | 2.56E-03 |               | nitroreductase                                                                            |
| CPE1063 | 3.25 | 5.18E-03 | <i>nqrD</i>   | electron transport complex RxE subunit                                                    |
| CPE1404 | 3.25 | 9.00E-03 |               | hypothetical protein                                                                      |
| CPE2183 | 3.25 | 3.75E-03 | <i>spolID</i> | stage II sporulation protein D                                                            |
| CPE1179 | 3.24 | 2.96E-04 | <i>pyrZ</i>   | dihydroorotate dehydrogenase electron transfer subunit                                    |
| CPE1469 | 3.23 | 5.23E-03 |               | aminotransferase class V                                                                  |
| CPE0204 | 3.23 | 2.77E-03 |               | acetyltransferase                                                                         |
| CPE1383 | 3.22 | 3.35E-03 |               | hypothetical protein                                                                      |
| CPE1621 | 3.22 | 5.41E-05 |               | hypothetical protein                                                                      |
| CPE2045 | 3.20 | 4.46E-03 | <i>spoVAE</i> | stage V sporulation protein AE                                                            |
| CPE1987 | 3.20 | 2.01E-03 |               | sensor histidine kinase                                                                   |
| CPE0665 | 3.19 | 1.93E-04 |               | hypothetical protein                                                                      |
| CPE1458 | 3.18 | 2.76E-03 |               | hypothetical protein                                                                      |
| CPE1202 | 3.17 | 4.93E-03 |               | calcium-transporting ATPase                                                               |
| CPE2222 | 3.17 | 7.30E-03 | <i>cotS</i>   | spore coat protein                                                                        |
| CPE0686 | 3.16 | 1.18E-03 | <i>purH</i>   | bifunctional phosphoribosylaminoimidazolecarboxamide formyltransferase/IMP cyclohydrolase |
| CPE0232 | 3.16 | 3.01E-03 | <i>glpT</i>   | glycerol-3-phosphate transporter                                                          |
| CPE2104 | 3.16 | 4.03E-03 |               | hypothetical protein                                                                      |
| CPE0849 | 3.16 | 4.14E-03 |               | hypothetical protein                                                                      |
| CPE0187 | 3.15 | 1.73E-06 |               | cryptic beta-D-galactosidase subunit beta                                                 |
| CPE0404 | 3.15 | 1.63E-03 | <i>brnQ</i>   | branched chain amino acid ABC transporter carrier protein                                 |
| CPE0050 | 3.15 | 3.75E-03 |               | hypothetical protein                                                                      |
| CPE0931 | 3.15 | 1.08E-04 |               | coenzyme B12-dependent glycerol dehydrogenase small subunit                               |
| SR31    | 3.14 | 3.42E-06 |               | Region between CPE0594 and CPE0595                                                        |
| CPE1896 | 3.13 | 2.94E-03 |               | hypothetical protein                                                                      |
| CPE2367 | 3.12 | 4.74E-03 |               | N-acetylmuramoyl-L-alanine amidase                                                        |
| CPE2292 | 3.12 | 5.65E-03 |               | hypothetical protein                                                                      |
| CPE0950 | 3.12 | 4.16E-03 |               | hypothetical protein                                                                      |
| CPE2482 | 3.12 | 8.52E-03 |               | stage V sprulation protein T                                                              |
| CPE0466 | 3.12 | 3.21E-03 |               | hypothetical protein                                                                      |
| CPE0738 | 3.11 | 1.77E-04 |               | hypothetical protein                                                                      |
| CPE2473 | 3.10 | 4.10E-03 | <i>spolIE</i> | stage II sprulation protein E                                                             |
| CPE2081 | 3.10 | 6.25E-05 |               | ABC transporter                                                                           |
| CPE0658 | 3.09 | 3.40E-03 |               | hypothetical protein                                                                      |
| CPE1802 | 3.08 | 3.33E-03 |               | hypothetical protein                                                                      |

|         |      |          |              |                                                            |
|---------|------|----------|--------------|------------------------------------------------------------|
| CPE0890 | 3.08 | 3.59E-03 |              | hypothetical protein                                       |
| CPE1025 | 3.08 | 7.84E-03 | <i>pykA</i>  | pyruvate kinase                                            |
| CPE0456 | 3.06 | 3.56E-03 |              | hypothetical protein                                       |
| CPE0347 | 3.06 | 3.43E-03 |              | transcriptional regulator                                  |
| CPE1276 | 3.06 | 8.92E-03 |              | multidrug efflux pump VmrA                                 |
| CPE0867 | 3.03 | 4.57E-03 |              | hypothetical protein                                       |
| CPE1514 | 3.03 | 6.78E-04 | <i>argI</i>  | ArgI-related protein                                       |
| CPE2054 | 3.03 | 5.84E-03 |              | cation-transporting ATPase                                 |
| CPE2559 | 3.02 | 4.74E-03 |              | hypothetical protein                                       |
| CPE0346 | 3.02 | 3.84E-03 |              | transcriptional regulator                                  |
| CPE2178 | 3.01 | 4.82E-03 |              | hypothetical protein                                       |
| CPE1238 | 3.01 | 1.01E-03 |              | multidrug resistance protein                               |
| SR79    | 3.00 | 7.74E-06 |              | Region between CPE2288 and CPE2289                         |
| CPE1230 | 3.00 | 4.03E-03 |              | hypothetical protein                                       |
| CPE2344 | 3.00 | 7.37E-06 |              | carbohydrate diacid transcriptional activator CdaR         |
| CPE0683 | 2.99 | 3.40E-03 | <i>purF</i>  | amidophosphoribosyltransferase                             |
| CPE2021 | 2.98 | 6.57E-03 |              | sporulation protein YqfC                                   |
| CPE1050 | 2.98 | 9.70E-03 |              | 5'-methylthioadenosine/S-adenosylhomocysteine nucleosidase |
| CPE0784 | 2.97 | 1.33E-03 | <i>vgaB</i>  | ABC transporter                                            |
| CPE0245 | 2.96 | 3.44E-03 |              | GGDEF/EAL domain protein                                   |
| CPE2256 | 2.94 | 8.51E-04 |              | oligopeptide-binding protein                               |
| CPE2246 | 2.94 | 2.83E-04 |              | hypothetical protein                                       |
| CPE0386 | 2.93 | 3.78E-04 |              | transcriptional regulator                                  |
| CPE0644 | 2.93 | 8.66E-06 | <i>flaV</i>  | flavodoxin                                                 |
| CPE1122 | 2.91 | 9.00E-03 |              | phage-related head protein                                 |
| CPE1143 | 2.91 | 4.65E-03 |              | hypothetical protein                                       |
| CPE1139 | 2.90 | 9.11E-03 |              | hypothetical protein                                       |
| CPE1212 | 2.89 | 3.43E-05 | <i>uraA</i>  | uracil permease                                            |
| CPE2585 | 2.89 | 5.37E-03 |              | nucleoside recognition domain protein                      |
| CPE1271 | 2.87 | 3.67E-03 |              | ABC transporter                                            |
| CPE1324 | 2.86 | 9.15E-03 |              | amino acid ABC transporter                                 |
| CPE0564 | 2.86 | 4.21E-03 | <i>spoVD</i> | stage V sporulation protein D                              |
| CPE1960 | 2.85 | 2.13E-05 | <i>hprT</i>  | hypoxanthine phosphoribosyltransferase                     |
| SR13    | 2.84 | 3.50E-03 |              | Region between CPE0143 and CPE0144                         |
| CPE1565 | 2.82 | 3.92E-04 |              | putative calcium/sodium:proton antiporter                  |
| CPE1379 | 2.81 | 6.24E-03 |              | D-alanyl-D-alanine carboxypeptidase                        |
| CPE0383 | 2.81 | 7.43E-03 |              | hypothetical protein                                       |
| CPE1522 | 2.80 | 5.91E-03 |              | hypothetical protein                                       |
| CPE0814 | 2.80 | 7.93E-03 |              | GNAT family acetyltransferase                              |
| CPE0762 | 2.77 | 7.17E-04 |              | HAD superfamily (subfamily IA) hydrolase                   |
| CPE1287 | 2.76 | 7.60E-03 |              | hypothetical protein                                       |
| CPE0161 | 2.75 | 7.32E-03 |              | hypothetical protein                                       |
| CPE1018 | 2.75 | 8.34E-03 |              | 4-amino-4-deoxychorismate lyase                            |
| CPE2271 | 2.75 | 9.61E-05 | <i>dppC</i>  | oligopeptide ABC transporter                               |

|         |      |          |              |                                                              |
|---------|------|----------|--------------|--------------------------------------------------------------|
| CPE0092 | 2.74 | 7.32E-03 |              | symporter YidK                                               |
| CPE0336 | 2.74 | 6.91E-03 |              | threonine and homoserine efflux system                       |
| CPE0431 | 2.73 | 6.16E-03 |              | hypothetical protein                                         |
| CPE0283 | 2.72 | 3.88E-05 |              | hypothetical protein                                         |
| CPE0335 | 2.72 | 5.71E-04 | <i>xpt</i>   | xanthine phosphoribosyltransferase                           |
| CPE0453 | 2.70 | 8.22E-03 |              | MerR family transcriptional regulator                        |
| CPE0792 | 2.70 | 4.65E-04 |              | iron(III) dicitrate ABC transporter                          |
| CPE1828 | 2.69 | 8.64E-03 |              | stage III sporulation protein AF                             |
| CPE1477 | 2.69 | 9.92E-03 |              | polysaccharide deacetylase                                   |
| CPE2121 | 2.68 | 1.95E-04 | <i>dacF</i>  | D-alanyl-D-alanine carboxypeptidase                          |
| CPE2107 | 2.67 | 3.37E-03 |              | hypothetical protein                                         |
| CPE2453 | 2.67 | 1.63E-03 |              | Orn/Lys/Arg decarboxylase                                    |
| CPE2607 | 2.67 | 6.17E-04 |              | hypothetical protein                                         |
| CPE0757 | 2.67 | 4.37E-03 |              | creatinase                                                   |
| CPE1046 | 2.66 | 7.25E-03 |              | putative alpha-glucosidase                                   |
| CPE1343 | 2.65 | 1.36E-03 | <i>mgIC</i>  | beta-methylgalactoside transporter inner membrane component  |
| CPE1365 | 2.65 | 7.26E-04 |              | hypothetical protein                                         |
| CPE0219 | 2.63 | 9.96E-03 |              | AraC family transcriptional regulator                        |
| SR41    | 2.62 | 1.61E-04 |              | Region between CPE0826 and CPE0827                           |
| CPE2272 | 2.61 | 8.65E-05 | <i>dppB</i>  | oligopeptide ABC transporter                                 |
| CPE0930 | 2.60 | 2.18E-04 |              | coenzyme B12-dependent glycerol dehydrogenase medium subunit |
| CPE1293 | 2.60 | 7.76E-03 |              | tetratricopeptide repeat protein                             |
| PCP30   | 2.59 | 7.25E-03 |              | hypothetical protein                                         |
| CPE1507 | 2.57 | 8.34E-05 |              | endo-1,4-beta-xylanase                                       |
| CPE1913 | 2.56 | 4.41E-05 |              | pheromone autoinducer 2 transporter                          |
| CPE1659 | 2.56 | 3.35E-05 | <i>feoA</i>  | ferrous iron transport protein A                             |
| CPE0481 | 2.56 | 7.27E-03 |              | beta-1,4-galactosyltransferase                               |
| CPE0520 | 2.54 | 1.43E-04 |              | hypothetical protein                                         |
| CPE2280 | 2.53 | 9.20E-03 |              | hypothetical protein                                         |
| CPE1912 | 2.52 | 2.13E-04 |              | hypothetical protein                                         |
| CPE0558 | 2.52 | 9.50E-05 |              | glycine betaine/carnitine/choline ABC transporter            |
| CPE0759 | 2.51 | 6.95E-04 |              | carbohydrate diacid transcriptional activator CdaR           |
| CPE0663 | 2.51 | 7.31E-05 |              | F5/8 type C domain protein                                   |
| CPE0632 | 2.51 | 1.06E-04 | <i>brnQ</i>  | branched chain amino acid ABC transporter carrier protein    |
| CPE1415 | 2.51 | 2.87E-05 |              | alpha-mannosidase                                            |
| CPE1247 | 2.50 | 1.29E-03 | <i>mprF2</i> | lysyl-tRNA synthetase                                        |
| CPE0021 | 2.46 | 1.19E-05 | <i>addA</i>  | ATP-dependent deoxyribonuclease chain A                      |
| CPE0681 | 2.46 | 7.49E-03 | <i>purE</i>  | phosphoribosylaminoimidazole carboxylase, catalytic subunit  |
| CPE0508 | 2.45 | 6.86E-03 |              | hypothetical protein                                         |
| CPE2617 | 2.43 | 2.87E-03 |              | acyl-ACP thioesterase                                        |
| CPE0828 | 2.43 | 1.00E-03 |              | hypothetical protein                                         |
| CPE2505 | 2.41 | 9.03E-03 |              | MATE efflux family protein                                   |
| CPE0754 | 2.41 | 1.73E-05 | <i>clsC</i>  | cardiolipin synthetase                                       |

|         |      |          |             |                                                             |
|---------|------|----------|-------------|-------------------------------------------------------------|
| CPE0430 | 2.40 | 1.74E-03 | <i>sipS</i> | type I signal peptidase                                     |
| SR78    | 2.39 | 9.46E-04 |             | Region between CPE2276 and CPE2277                          |
| CPE1396 | 2.39 | 1.74E-04 |             | ATP-dependent RNA helicase, DEAD/DEAH box family            |
| CPE1481 | 2.36 | 9.05E-05 |             | hypothetical protein                                        |
| CPE1505 | 2.36 | 2.28E-05 | <i>uraA</i> | uracil transporter                                          |
| CPE2010 | 2.36 | 7.39E-03 | <i>cotS</i> | spore coat protein                                          |
| PCP63   | 2.36 | 5.69E-05 |             | hypothetical protein                                        |
| SR39    | 2.36 | 8.65E-04 |             | Region between CPE0738 and CPE0739                          |
| CPE1016 | 2.31 | 5.03E-03 | <i>pabA</i> | anthranilate synthase component II                          |
| CPE0254 | 2.31 | 4.65E-03 |             | hypothetical protein                                        |
| CPE1979 | 2.31 | 1.71E-03 |             | hypothetical protein                                        |
| SR90    | 2.31 | 1.86E-04 |             | Region between CPE2541 and CPE2542                          |
| SR37    | 2.29 | 9.08E-05 |             | Region between CPE0709 and CPE0710                          |
| CPE1529 | 2.29 | 3.10E-04 |             | hypothetical protein                                        |
| CPE1241 | 2.26 | 5.07E-04 |             | hypothetical protein                                        |
| CPE1926 | 2.25 | 3.24E-04 |             | sensor histidine kinase                                     |
| CPE1426 | 2.24 | 6.70E-04 |             | hypothetical protein                                        |
| CPE0028 | 2.24 | 1.56E-03 | <i>psdD</i> | phosphatidylserine decarboxylase                            |
| CPE0676 | 2.23 | 7.08E-03 |             | hypothetical protein                                        |
| CPE2560 | 2.23 | 5.65E-03 |             | spore cortex-lytic enzyme SleC                              |
| CPE0072 | 2.23 | 3.84E-03 |             | putative aminobenzoyl-glutamate transporter                 |
| CPE1598 | 2.23 | 1.77E-04 |             | hypothetical protein                                        |
| CPE0929 | 2.22 | 1.28E-04 |             | coenzyme B12-dependent glycerol dehydrogenase large subunit |
| CPE1026 | 2.21 | 7.95E-03 |             | undecaprenyl pyrophosphate phosphatase                      |
| CPE0263 | 2.20 | 1.77E-04 |             | hypothetical protein                                        |
| CPE1520 | 2.20 | 5.52E-03 | <i>ilvE</i> | branched-chain amino acid aminotransferase                  |
| CPE0074 | 2.19 | 2.03E-03 |             | transcription antiterminator                                |
| CPE1476 | 2.18 | 3.12E-04 |             | hypothetical protein                                        |
| CPE1161 | 2.18 | 8.65E-05 | <i>lexA</i> | LexA repressor                                              |
| CPE1556 | 2.17 | 2.55E-03 |             | hypothetical protein                                        |
| CPE1284 | 2.17 | 3.77E-03 |             | pyrimidine nucleoside transporter                           |
| CPE0084 | 2.16 | 1.38E-04 | <i>iolR</i> | transcription repressor of myo-inositol catabolism operon   |
| CPE0932 | 2.16 | 3.59E-04 |             | glycerol dehydratase reactivation factor, large subunit     |
| CPE2648 | 2.15 | 6.27E-03 |             | sporulation integral membrane protein YtvI                  |
| SR89    | 2.14 | 1.88E-04 |             | Region between CPE2527 and CPE2528                          |
| CPE0725 | 2.14 | 3.83E-05 | <i>nanI</i> | exo-alpha-sialidase                                         |
| CPE0472 | 2.14 | 3.35E-03 |             | ABC transporter                                             |
| CPE0836 | 2.14 | 8.88E-03 |             | hypothetical protein                                        |
| CPE0736 | 2.13 | 4.18E-03 |             | amino acid ABC transporter permease                         |
| CPE2080 | 2.13 | 4.64E-04 |             | alpha-mannosidase                                           |
| CPE0714 | 2.13 | 1.14E-04 |             | diacylglycerol glucosyltransferase                          |
| CPE1163 | 2.12 | 2.26E-04 | <i>xerC</i> | site-specific tyrosine recombinase XerC                     |
| CPE1144 | 2.10 | 6.07E-04 |             | transcriptional regulator                                   |
| CPE2358 | 2.08 | 1.65E-04 |             | sigma-L-dependent transcriptional regulator                 |

|         |      |          |             |                                                         |
|---------|------|----------|-------------|---------------------------------------------------------|
| CPE1500 | 2.08 | 8.73E-03 | <i>virS</i> | sensor histidine kinase VirS                            |
| CPE1051 | 2.07 | 5.89E-04 | <i>cfa</i>  | cyclopropane-fatty-acyl-phospholipid synthase           |
| CPE1751 | 2.05 | 4.70E-03 |             | hypothetical protein                                    |
| CPE0207 | 2.01 | 4.47E-03 |             | two-component sensor histidine kinase                   |
| CPE2103 | 2.01 | 3.42E-03 |             | ribosomal protein L11 methyltransferase                 |
| PCP59   | 2.01 | 1.89E-04 |             | hypothetical protein                                    |
| CPE0978 | 2.00 | 4.17E-03 |             | potassium transport protein Kup                         |
| CPE2553 | 1.99 | 1.52E-03 | <i>glpP</i> | glycerol uptake operon antiterminator                   |
| CPE1456 | 1.98 | 9.00E-03 |             | ABC transporter                                         |
| CPE0827 | 1.98 | 9.61E-05 |             | polysaccharide deacetylase                              |
| CPE1283 | 1.98 | 2.14E-03 |             | transcriptional regulator                               |
| CPE1374 | 1.95 | 1.48E-03 |             | calcium/proton exchanger                                |
| CPE1882 | 1.94 | 6.39E-04 |             | peptidase U32                                           |
| CPE2053 | 1.94 | 1.49E-03 |             | hypothetical protein                                    |
| CPE1563 | 1.91 | 9.64E-04 |             | hypothetical protein                                    |
| CPE2247 | 1.91 | 8.02E-03 |             | 2-aminoethylphosphonate ABC transporter substrate-b     |
| CPE1787 | 1.90 | 5.36E-03 |             | recombination factor protein RarA                       |
| PCP60   | 1.90 | 1.66E-04 |             | hypothetical protein                                    |
| CPE0949 | 1.90 | 8.29E-03 |             | ABC transporter                                         |
| PCP62   | 1.90 | 2.80E-03 |             | hypothetical protein                                    |
| CPE1623 | 1.89 | 1.03E-03 |             | lipoprotein                                             |
| CPE0933 | 1.89 | 4.11E-03 |             | glycerol dehydratase reactivation factor, small subunit |
| CPE0289 | 1.89 | 3.39E-04 |             | endo-beta-N-acetylglucosaminidase                       |
| CPE0999 | 1.89 | 1.25E-04 |             | hypothetical protein                                    |
| CPE0073 | 1.88 | 6.24E-03 |             | transcription antiterminator                            |
| CPE2159 | 1.88 | 9.18E-04 |             | chromosome segregation protein                          |
| SR43    | 1.88 | 1.90E-03 |             | Region between CPE0878 and CPE0879                      |
| CPE0437 | 1.87 | 2.57E-04 | <i>hlyB</i> | hemolysin                                               |
| CPE1457 | 1.87 | 3.50E-03 |             | ABC transporter                                         |
| SR51    | 1.87 | 8.74E-05 |             | Region between CPE1166 and CPE1167                      |
| CPE1228 | 1.86 | 2.35E-03 | <i>cbiK</i> | CbiK protein                                            |
| CPE0426 | 1.86 | 9.96E-04 |             | hypothetical protein                                    |
| CPE2078 | 1.86 | 1.96E-03 |             | hypothetical protein                                    |
| CPE0841 | 1.86 | 8.87E-03 |             | two-component sensor histidine kinase                   |
| CPE0104 | 1.85 | 1.57E-03 |             | hypothetical protein                                    |
| CPE0071 | 1.84 | 6.51E-03 | <i>clsA</i> | cardiolipin synthase                                    |
| CPE1864 | 1.84 | 2.21E-04 |             | hypothetical protein                                    |
| CPE2498 | 1.82 | 1.82E-03 |             | Ser/Thr protein phosphatase                             |
| CPE2296 | 1.82 | 4.78E-03 |             | ABC transporter                                         |
| PCP58   | 1.81 | 6.17E-04 |             | hypothetical protein                                    |
| CPE1976 | 1.81 | 1.33E-03 | <i>dacF</i> | D-alanyl-D-alanine carboxypeptidase                     |
| SR71    | 1.81 | 6.64E-03 |             | Region between CPE2071 and CPE2072                      |
| CPE1551 | 1.80 | 3.39E-04 |             | endo-1,4-beta-xylanase                                  |
| CPE1658 | 1.79 | 5.81E-03 |             | hypothetical protein                                    |



|         |      |          |              |                                                      |
|---------|------|----------|--------------|------------------------------------------------------|
| CPE0035 | 1.79 | 2.34E-04 | <i>ypIC</i>  | hypothetical protein                                 |
| CPE0772 | 1.78 | 5.22E-03 |              | hypothetical protein                                 |
| CPE0646 | 1.77 | 4.16E-04 |              | hypothetical protein                                 |
| CPE1727 | 1.75 | 3.50E-03 |              | hypothetical protein                                 |
| CPE0970 | 1.75 | 2.43E-03 |              | Na <sup>+</sup> /H <sup>+</sup> antiporter           |
| CPE1880 | 1.73 | 2.62E-03 | <i>spoVD</i> | stage V sporulation protein D                        |
| CPE0162 | 1.73 | 3.81E-03 | <i>pfoR</i>  | regulatory protein                                   |
| CPE2522 | 1.71 | 8.77E-03 |              | cyclic nucleotide-binding protein                    |
| CPE2094 | 1.70 | 4.67E-03 |              | NADH-plastoquinone oxidoreductase subunit            |
| CPE2494 | 1.69 | 4.77E-04 |              | transcriptional regulator                            |
| CPE1759 | 1.68 | 9.37E-04 | <i>nrdR</i>  | transcriptional regulator NrdR                       |
| CPE0434 | 1.68 | 9.72E-04 |              | GNAT family acetyltransferase                        |
| CPE2592 | 1.65 | 1.10E-03 | <i>phnA</i>  | phnA family protein                                  |
| CPE0595 | 1.64 | 5.36E-03 | <i>lysA</i>  | diaminopimelate decarboxylase                        |
| CPE2165 | 1.64 | 1.45E-03 |              | glycoprotease                                        |
| CPE1316 | 1.64 | 3.21E-03 |              | two-component sensor histidine kinase                |
| CPE2082 | 1.63 | 4.37E-03 |              | ABC transporter                                      |
| CPE1767 | 1.63 | 4.77E-04 | <i>pilT</i>  | twitching motility protein PilT                      |
| CPE1169 | 1.62 | 6.95E-04 |              | hypothetical protein                                 |
| CPE0184 | 1.61 | 1.10E-03 | <i>nanP</i>  | N-acetylmannosamine-6-phosphate 2-epimerase          |
| CPE0004 | 1.60 | 7.39E-04 | <i>recF</i>  | recombination protein F                              |
| CPE1779 | 1.60 | 4.14E-03 |              | hypothetical protein                                 |
| CPE1166 | 1.59 | 1.22E-03 |              | lysine specific permease                             |
| SR5     | 1.57 | 2.75E-03 |              | Region between CPE0075 and CPE0076                   |
| CPE0185 | 1.57 | 1.07E-03 | <i>nanA</i>  | N-acetylneuraminase lyase                            |
| CPE2216 | 1.56 | 1.58E-03 |              | hypothetical protein                                 |
| CPE2475 | 1.56 | 1.93E-03 |              | hypothetical protein                                 |
| CPE2590 | 1.54 | 4.10E-03 |              | phage infection protein                              |
| CPE0789 | 1.54 | 1.97E-03 |              | transcriptional regulator                            |
| CPE0671 | 1.53 | 7.18E-03 |              | hypothetical protein                                 |
| CPE1914 | 1.53 | 1.94E-03 |              | PBP 5 synthesis repressor                            |
| CPE1847 | 1.53 | 5.16E-03 |              | fibronectin-binding protein                          |
| CPE0291 | 1.53 | 3.04E-03 | <i>acpS</i>  | 4'-phosphopantetheinyl transferase                   |
| CPE1653 | 1.51 | 3.67E-03 |              | hypothetical protein                                 |
| CPE0314 | 1.50 | 2.05E-03 |              | hypothetical protein                                 |
| CPE2307 | 1.49 | 8.87E-03 |              | hypothetical protein                                 |
| CPE0882 | 1.49 | 1.85E-03 |              | hypothetical protein                                 |
| CPE1963 | 1.47 | 1.64E-03 |              | hypothetical protein                                 |
| CPE0782 | 1.47 | 7.32E-03 |              | alkyl hydroperoxide reductase                        |
| CPE1430 | 1.47 | 5.22E-03 | <i>clsD</i>  | cardiolipin synthase                                 |
| PCP33   | 1.46 | 2.27E-03 |              | hypothetical protein                                 |
| CPE2206 | 1.46 | 6.64E-03 |              | monogalactosyldiacylglycerol synthase                |
| CPE1329 | 1.43 | 1.04E-03 |              | CDP-diacylglycerol--serine O-phosphatidyltransferase |
| CPE1445 | 1.42 | 1.91E-03 |              | AraC family transcriptional regulator                |

|         |      |          |              |                                                        |
|---------|------|----------|--------------|--------------------------------------------------------|
| CPE1227 | 1.42 | 8.49E-03 | <i>cbiC</i>  | precorrin-8X methylmutase                              |
| CPE0953 | 1.42 | 5.36E-03 |              | pyridine nucleotide-disulphide oxidoreductase          |
| CPE1825 | 1.40 | 1.35E-03 |              | alkaline shock protein                                 |
| CPE0766 | 1.40 | 3.31E-03 |              | hypothetical protein                                   |
| CPE2531 | 1.40 | 1.94E-03 | <i>adhE</i>  | bifunctional acetaldehyde-CoA/alcohol dehydrogenase    |
| CPE0610 | 1.40 | 1.51E-03 |              | chromosome segregation protein                         |
| CPE1634 | 1.39 | 1.19E-03 | <i>tagO</i>  | undecaprenyl-phosphate N-acetylglucosaminyltransferase |
| CPE1346 | 1.39 | 1.08E-03 | <i>galT</i>  | galactose-1-phosphate uridylyltransferase              |
| CPE0180 | 1.39 | 7.65E-03 |              | hypothetical protein                                   |
| CPE0605 | 1.38 | 1.45E-03 |              | cation efflux family protein                           |
| CPE1171 | 1.36 | 3.62E-03 |              | hypothetical protein                                   |
| CPE1883 | 1.35 | 8.96E-03 |              | histidinol-phosphatase                                 |
| CPE0662 | 1.35 | 3.37E-03 |              | photosystem I assembly protein Ycf3                    |
| CPE1203 | 1.33 | 6.27E-03 | <i>spoVB</i> | stage V sporulation protein B                          |
| CPE1210 | 1.32 | 8.39E-03 |              | FUR family transcriptional regulator                   |
| CPE2012 | 1.32 | 3.54E-03 |              | CBS domain protein                                     |
| CPE2145 | 1.32 | 2.02E-03 | <i>maf</i>   | Maf-like protein                                       |
| CPE1664 | 1.31 | 3.05E-03 |              | peptidase, M50 family                                  |
| CPE0159 | 1.31 | 8.69E-03 |              | hypothetical protein                                   |
| CPE1506 | 1.31 | 2.99E-03 |              | ABC transporter                                        |
| CPE2539 | 1.30 | 4.96E-03 | <i>ccpA</i>  | transcriptional regulator                              |
| CPE2474 | 1.30 | 2.57E-03 |              | general stress protein 13                              |
| CPE2345 | 1.30 | 2.32E-03 |              | maltose ABC transportor                                |
| CPE2275 | 1.29 | 4.87E-03 | <i>guaA</i>  | GMP synthase                                           |
| CPE0136 | 1.28 | 5.52E-03 |              | hypothetical protein                                   |
| CPE0100 | 1.28 | 6.72E-03 |              | dihydroxyacetone kinase                                |
| CPE0922 | 1.27 | 3.85E-03 |              | hypothetical protein                                   |
| CPE0005 | 1.26 | 4.60E-03 |              | hypothetical protein                                   |
| CPE1475 | 1.25 | 3.93E-03 |              | LysR family transcriptional regulator                  |
| CPE2237 | 1.25 | 2.98E-03 |              | arylsulfatase                                          |
| SR94    | 1.24 | 7.50E-03 |              | Region between CPE1138 and CPE1139                     |
| PCP32   | 1.23 | 5.95E-03 |              | resolvase                                              |
| CPE2158 | 1.21 | 6.90E-03 |              | ABC transporter substrate-binding protein              |
| CPE1015 | 1.21 | 6.49E-03 |              | error-prone DNA polymerase                             |
| CPE1153 | 1.20 | 8.19E-03 | <i>pflA</i>  | formate acetyltransferase                              |
| CPE2548 | 1.20 | 6.88E-03 |              | methyltransferase                                      |
| CPE0452 | 1.20 | 3.93E-03 | <i>entC</i>  | enterotoxin                                            |
| CPE1281 | 1.19 | 4.27E-03 |              | hypothetical protein                                   |
| CPE1701 | 1.19 | 6.68E-03 |              | transcriptional repressor CodY                         |
| CPE0856 | 1.17 | 5.99E-03 |              | alpha-mannosidase                                      |
| CPE1167 | 1.16 | 7.93E-03 |              | glutamate/ aspartate transporter                       |
| CPE0189 | 1.15 | 4.52E-03 |              | RpiR family transcriptional regulator                  |
| SR69    | 1.15 | 7.13E-03 |              | Region between CPE1977 and CPE1978                     |
| CPE1540 | 1.12 | 8.18E-03 |              | ABC transporter                                        |

|         |       |          |                |                                                                                     |
|---------|-------|----------|----------------|-------------------------------------------------------------------------------------|
| CPE1191 | 1.11  | 9.82E-03 |                | hypothetical protein                                                                |
| CPE0310 | 1.03  | 9.44E-03 |                | L-lactate permease                                                                  |
| CPE0937 | -1.02 | 9.11E-03 |                | amino acid permease                                                                 |
| CPE0791 | -1.04 | 7.32E-03 |                | NAD(P)H dehydrogenase                                                               |
| CPE0904 | -1.06 | 8.67E-03 | <i>eutT</i>    | ethanolamine utilization cobalamin adenosyltransferase                              |
| CPE1741 | -1.06 | 5.56E-03 |                | RNA-binding Sun protein                                                             |
| CPE2425 | -1.06 | 7.25E-03 | <i>thyX</i>    | FAD-dependent thymidylate synthase                                                  |
| CPE1344 | -1.06 | 7.41E-03 |                | aldose 1-epimerase                                                                  |
| CPE2138 | -1.07 | 7.13E-03 | <i>minD</i>    | septum site-determining protein MinD                                                |
| CPE1009 | -1.07 | 6.41E-03 | <i>mgsA</i>    | methylglyoxal synthase                                                              |
| CPE1906 | -1.07 | 4.94E-03 | <i>dapB</i>    | dihydrodipicolinate reductase                                                       |
| CPE1746 | -1.09 | 4.47E-03 |                | bifunctional phosphopantothenoylcysteine decarboxylase/phosphopantothenate synthase |
| CPE1196 | -1.09 | 6.12E-03 |                | hypothetical protein                                                                |
| CPE1573 | -1.09 | 8.59E-03 |                | bifunctional glutamate--cysteine ligase/glutathione synthetase                      |
| CPE2335 | -1.09 | 9.92E-03 |                | hypothetical protein                                                                |
| CPE0046 | -1.09 | 7.76E-03 |                | hypothetical protein                                                                |
| CPE2459 | -1.09 | 7.16E-03 | <i>murD</i>    | UDP-N-acetylmuramoyl-L-alanyl-D-glutamate synthetase                                |
| CPE0806 | -1.09 | 7.47E-03 |                | hypothetical protein                                                                |
| SR48    | -1.09 | 8.01E-03 |                | Region between CPE0997 and CPE0998                                                  |
| CPE0625 | -1.10 | 6.43E-03 |                | hypothetical protein                                                                |
| CPE2197 | -1.10 | 8.07E-03 | <i>upp</i>     | uracil phosphoribosyltransferase                                                    |
| PCP57   | -1.10 | 8.22E-03 | <i>cna</i>     | collagen adhesin                                                                    |
| CPE0031 | -1.10 | 7.82E-03 |                | cytidine/deoxycytidylate deaminase                                                  |
| CPE1683 | -1.11 | 5.49E-03 | <i>truB</i>    | tRNA pseudouridine synthase B                                                       |
| CPE0510 | -1.12 | 3.86E-03 | <i>galF</i>    | UTP-glucose-1-phosphate uridylyltransferase                                         |
| CPE2133 | -1.13 | 9.20E-03 |                | radical SAM domain protein                                                          |
| CPE2015 | -1.13 | 5.65E-03 | <i>era</i>     | GTP-binding protein Era                                                             |
| CPE0982 | -1.13 | 8.79E-03 |                | hypothetical protein                                                                |
| CPE2259 | -1.14 | 3.73E-03 | <i>ligA</i>    | NAD-dependent DNA ligase LigA                                                       |
| CPE0008 | -1.14 | 2.71E-03 |                | DNA gyrase subunit A                                                                |
| CPE1734 | -1.16 | 4.47E-03 | <i>rpmB</i>    | 50S ribosomal protein L28                                                           |
| CPE2659 | -1.16 | 2.63E-03 | <i>rnpA</i>    | ribonuclease P                                                                      |
| CPE0056 | -1.17 | 4.46E-03 | <i>mtn</i>     | 5'-methylthioadenosine/S-adenosylhomocysteine nucleosidase                          |
| CPE1755 | -1.17 | 3.45E-03 | <i>engA</i>    | GTP-binding protein EngA                                                            |
| CPE2170 | -1.17 | 3.54E-03 | <i>prfB</i>    | peptide chain release factor 2                                                      |
| CPE1859 | -1.18 | 2.37E-03 | <i>spoVE</i>   | stage V sporulation protein E                                                       |
| CPE1503 | -1.18 | 7.26E-03 |                | hypothetical protein                                                                |
| CPE2202 | -1.19 | 5.36E-03 | <i>prfA</i>    | peptide chain release factor 1                                                      |
| CPE2657 | -1.20 | 1.93E-03 | <i>spolIII</i> | inner membrane protein translocase component YidC                                   |
| CPE1187 | -1.20 | 3.75E-03 | <i>manA</i>    | mannose-6-phosphate isomerase                                                       |
| CPE1234 | -1.20 | 5.47E-03 | <i>nagJ</i>    | hyaluronidase                                                                       |
| CPE2605 | -1.20 | 6.77E-03 |                | metallo-beta-lactamase                                                              |

|         |       |          |             |                                                                              |
|---------|-------|----------|-------------|------------------------------------------------------------------------------|
| CPE0300 | -1.20 | 3.21E-03 | <i>ftsX</i> | cell-division protein                                                        |
| CPE0626 | -1.21 | 7.47E-03 |             | hypothetical protein                                                         |
| PCP51   | -1.21 | 6.70E-03 |             | type IV secretion system protein VirD4                                       |
| CPE0742 | -1.22 | 3.06E-03 | <i>lipB</i> | lipase                                                                       |
| CPE0823 | -1.23 | 2.80E-03 |             | PTS system                                                                   |
| CPE1971 | -1.23 | 4.52E-03 | <i>potD</i> | spermidine/putrescine ABC transporter                                        |
| CPE0353 | -1.23 | 4.59E-03 | <i>murB</i> | UDP-N-acetylenolpyruvoylglucosamine reductase                                |
| CPE0375 | -1.23 | 5.37E-03 |             | endo-beta-galactosidase C                                                    |
| CPE0549 | -1.23 | 3.75E-03 | <i>dclY</i> | Orn/Lys/Arg decarboxylase                                                    |
| CPE1946 | -1.23 | 6.16E-03 | <i>queA</i> | S-adenosylmethionine:tRNA ribosyltransferase-isomerase                       |
| CPE0110 | -1.24 | 4.34E-03 | <i>thiH</i> | thiamine biosynthesis protein ThiH                                           |
| CPE0150 | -1.24 | 5.99E-03 |             | 2-dehydro-3-deoxyphosphogluconate aldolase/4-hydroxy-2-oxoglutarate aldolase |
| CPE0216 | -1.24 | 4.01E-03 | <i>sbcC</i> | exonuclease SbcC                                                             |
| CPE2355 | -1.25 | 4.42E-03 |             | thioredoxin                                                                  |
| CPE1389 | -1.25 | 2.27E-03 | <i>engB</i> | ribosome biogenesis GTP-binding protein YsxC                                 |
| CPE0032 | -1.25 | 7.76E-03 |             | hypothetical protein                                                         |
| CPE0299 | -1.26 | 2.32E-03 | <i>ftsE</i> | cell-division ATP-binding protein                                            |
| CPE0305 | -1.26 | 5.65E-03 |             | ABC transporter                                                              |
| CPE2495 | -1.27 | 5.97E-03 | <i>punA</i> | purine nucleoside phosphorylase                                              |
| CPE2418 | -1.27 | 3.78E-03 | <i>nusG</i> | transcription antitermination protein NusG                                   |
| PCP50   | -1.27 | 4.56E-03 |             | hypothetical protein                                                         |
| CPE2339 | -1.28 | 1.47E-03 |             | alpha-glucosidase                                                            |
| CPE2168 | -1.28 | 1.91E-03 |             | 30S ribosomal protein S1                                                     |
| CPE2004 | -1.28 | 2.21E-03 |             | metal-binding protein                                                        |
| CPE0989 | -1.29 | 2.99E-03 | <i>sdhA</i> | L-serine dehydratase alpha subunit                                           |
| CPE2507 | -1.29 | 2.40E-03 | <i>nrdD</i> | anaerobic ribonucleoside triphosphate reductase                              |
| CPE2196 | -1.30 | 2.48E-03 |             | UDP-N-acetylglucosamine 2-epimerase                                          |
| CPE0447 | -1.30 | 1.51E-03 | <i>lguL</i> | lactoylglutathione lyase                                                     |
| CPE2322 | -1.31 | 5.01E-03 | <i>thrS</i> | threonyl-tRNA synthetase                                                     |
| CPE2357 | -1.31 | 2.81E-03 |             | phosphoenolpyruvate-protein phosphotransferase                               |
| CPE1314 | -1.31 | 4.93E-03 |             | muramidase                                                                   |
| CPE1740 | -1.31 | 9.96E-04 |             | ribosomal RNA large subunit methyltransferase N                              |
| CPE2419 | -1.32 | 2.75E-03 | <i>secE</i> | preprotein translocase subunit SecE                                          |
| CPE1682 | -1.32 | 2.20E-03 | <i>ribC</i> | bifunctional riboflavin kinase/FMN adenylyltransferase                       |
| CPE0577 | -1.32 | 6.90E-03 |             | ABC transporter permease                                                     |
| CPE2193 | -1.32 | 3.24E-03 | <i>atpl</i> | ATP synthase FOF1 subunit A                                                  |
| CPE1860 | -1.33 | 1.80E-03 | <i>mraY</i> | phospho-N-acetylmuramoyl-pentapeptide- transferase                           |
| CPE1690 | -1.33 | 1.88E-03 |             | ribosome maturation protein RimP                                             |
| CPE0741 | -1.33 | 3.26E-03 |             | cytochrome C-type biogenesis protein                                         |
| CPE2464 | -1.33 | 1.26E-03 | <i>glyS</i> | glycyl-tRNA synthetase                                                       |
| CPE2332 | -1.34 | 3.33E-03 |             | two-component response regulator                                             |
| CPE1392 | -1.34 | 2.78E-03 | <i>clpX</i> | ATP-dependent protease ATP-binding subunit ClpX                              |
| CPE0393 | -1.34 | 1.89E-03 |             | tartronate semialdehyde reductase                                            |
| CPE1945 | -1.34 | 1.48E-03 | <i>tgt</i>  | queuine tRNA-ribosyltransferase                                              |

|         |       |          |             |                                                      |
|---------|-------|----------|-------------|------------------------------------------------------|
| CPE1628 | -1.34 | 3.31E-03 |             | ribose ABC transporter                               |
| CPE1236 | -1.34 | 1.59E-03 | <i>sod</i>  | Mn/Fe superoxide dismutase                           |
| CPE0506 | -1.35 | 1.86E-03 | <i>galF</i> | UTP-glucose-1-phosphate uridylyltransferase          |
| CPE0654 | -1.35 | 1.39E-03 | <i>relA</i> | relA/spoT family protein                             |
| CPE2027 | -1.36 | 2.85E-03 | <i>prmA</i> | ribosomal protein L11 methyltransferase              |
| CPE0323 | -1.36 | 1.81E-03 |             | PTS system protein                                   |
| CPE2603 | -1.36 | 2.63E-03 |             | preprotein translocase subunit SecA                  |
| CPE2208 | -1.36 | 1.29E-03 | <i>pyrG</i> | CTP synthetase                                       |
| CPE0199 | -1.36 | 1.29E-03 | <i>malH</i> | maltose-6'-phosphate glucosidase                     |
| CPE1748 | -1.36 | 1.23E-03 | <i>gmk</i>  | guanylate kinase                                     |
| CPE0604 | -1.37 | 8.76E-04 |             | arylsulfatase                                        |
| CPE0301 | -1.37 | 2.35E-03 |             | carboxyl-terminal protease                           |
| CPE1525 | -1.37 | 6.68E-03 |             | ABC transporter                                      |
| PCP29   | -1.37 | 2.26E-03 |             | hypothetical protein                                 |
| CPE2624 | -1.38 | 1.49E-03 | <i>sdhA</i> | L-serine dehydratase alpha subunit                   |
| CPE0743 | -1.38 | 1.68E-03 | <i>cstA</i> | carbon starvation protein CstA                       |
| CPE0389 | -1.38 | 3.20E-03 | <i>arcD</i> | amino acid permease                                  |
| CPE2406 | -1.39 | 7.15E-04 | <i>rpsJ</i> | 30S ribosomal protein S10                            |
| CPE1508 | -1.39 | 2.68E-03 | <i>topB</i> | DNA topoisomerase III                                |
| CPE0012 | -1.40 | 1.10E-03 |             | hydroxyglutarate oxidase                             |
| CPE2432 | -1.40 | 1.09E-03 |             | DNA integrity scanning protein DisA                  |
| CPE2163 | -1.40 | 2.99E-03 |             | CBS domain protein                                   |
| CPE1315 | -1.40 | 1.91E-03 | <i>ddl</i>  | D-alanine--D-alanine ligase                          |
| CPE2293 | -1.41 | 9.64E-04 |             | 8-oxoguanine DNA glycosylase                         |
| CPE2653 | -1.41 | 5.03E-03 | <i>gidB</i> | 16S rRNA methyltransferase GidB                      |
| CPE0804 | -1.41 | 9.80E-04 |             | sensory box protein/histidinol phosphate phosphatase |
| CPE1743 | -1.42 | 1.10E-03 | <i>fmt</i>  | methionyl-tRNA formyltransferase                     |
| CPE0633 | -1.42 | 2.56E-03 | <i>trpS</i> | tryptophanyl-tRNA synthetase                         |
| CPE1323 | -1.42 | 2.78E-03 |             | CBS domain/MgtE intracellular domain protein         |
| CPE1890 | -1.42 | 1.11E-03 | <i>trkA</i> | potassium uptake system protein                      |
| CPE1933 | -1.43 | 7.87E-04 | <i>aspS</i> | aspartyl-tRNA synthetase                             |
| CPE0928 | -1.43 | 2.28E-03 |             | two-component response regulator                     |
| CPE2380 | -1.44 | 1.49E-03 | <i>rpmJ</i> | 50S ribosomal protein L36                            |
| CPE1936 | -1.44 | 9.64E-04 |             | metallo-beta-lactamase                               |
| CPE1382 | -1.44 | 1.10E-03 | <i>map</i>  | methionine aminopeptidase, type I                    |
| CPE0047 | -1.44 | 7.50E-03 | <i>recR</i> | recombination protein RecR                           |
| CPE0002 | -1.45 | 6.95E-04 | <i>dnaN</i> | DNA polymerase III subunit beta                      |
| CPE2150 | -1.45 | 1.80E-03 | <i>rpsA</i> | 30S ribosomal protein S1                             |
| CPE1715 | -1.45 | 1.33E-03 | <i>ftsY</i> | signal recognition particle-docking protein FtsY     |
| CPE1670 | -1.46 | 6.25E-04 | <i>aspC</i> | aspartate aminotransferase                           |
| CPE0599 | -1.46 | 7.17E-04 |             | DNA-dependent helicase II                            |
| CPE2636 | -1.46 | 1.91E-03 | <i>rplI</i> | 50S ribosomal protein L9                             |
| CPE0988 | -1.47 | 5.73E-03 | <i>sdhB</i> | L-serine dehydratase beta subunit                    |
| CPE1142 | -1.47 | 1.33E-03 |             | hypothetical protein                                 |

|         |       |          |             |                                                          |
|---------|-------|----------|-------------|----------------------------------------------------------|
| CPE0422 | -1.47 | 2.87E-03 |             | L-fucose transporter                                     |
| CPE0551 | -1.47 | 5.62E-04 | <i>speB</i> | agmatinase                                               |
| SR81    | -1.48 | 1.42E-03 |             | Region between CPE2302 and CPE2303                       |
| CPE1554 | -1.48 | 1.17E-03 |             | lipoprotein                                              |
| CPE2059 | -1.49 | 1.99E-03 |             | hypothetical protein                                     |
| CPE1013 | -1.49 | 1.69E-03 |             | hypothetical protein                                     |
| CPE0361 | -1.49 | 6.39E-04 | <i>pfkA</i> | 6-phosphofructokinase                                    |
| CPE1630 | -1.50 | 1.29E-03 | <i>rbsA</i> | ribose ABC transporter                                   |
| CPE1492 | -1.50 | 5.35E-03 |             | hypothetical protein                                     |
| CPE0304 | -1.50 | 6.07E-04 |             | degV family protein                                      |
| CPE0981 | -1.51 | 4.69E-03 |             | glycosyl hydrolase, family 20                            |
| CPE2640 | -1.51 | 1.18E-03 | <i>rpsR</i> | 30S ribosomal protein S18                                |
| CPE0689 | -1.51 | 2.08E-03 |             | hypothetical protein                                     |
| CPE1944 | -1.51 | 5.56E-04 | <i>yajC</i> | preprotein translocase subunit YajC                      |
| CPE1629 | -1.52 | 1.00E-03 | <i>rbsC</i> | ribose ABC transporter                                   |
| CPE1232 | -1.52 | 9.19E-04 |             | hypothetical protein                                     |
| CPE2412 | -1.52 | 1.18E-03 | <i>rpoC</i> | DNA-directed RNA polymerase subunit beta'                |
| CPE0656 | -1.53 | 1.24E-03 |             | hypothetical protein                                     |
| CPE2656 | -1.53 | 3.92E-04 | <i>jag</i>  | SpolIII-associated protein                               |
| CPE1463 | -1.53 | 9.00E-04 |             | PTS system protein                                       |
| CPE1892 | -1.54 | 4.96E-04 | <i>rplT</i> | 50S ribosomal protein L20                                |
| CPE1894 | -1.54 | 7.60E-04 | <i>infC</i> | translation initiation factor IF-3                       |
| CPE2524 | -1.54 | 4.50E-04 | <i>metG</i> | methionyl-tRNA synthetase                                |
| CPE0013 | -1.55 | 6.48E-03 |             | hypothetical protein                                     |
| CPE1934 | -1.55 | 5.78E-04 | <i>hisS</i> | histidyl-tRNA synthetase                                 |
| CPE1390 | -1.56 | 5.02E-04 | <i>lonA</i> | ATP-dependent protease La                                |
| CPE2023 | -1.56 | 7.17E-04 | <i>rpsU</i> | 30S ribosomal protein S21                                |
| CPE1744 | -1.57 | 1.12E-03 | <i>def</i>  | peptide deformylase                                      |
| CPE1631 | -1.57 | 5.11E-04 | <i>rbsD</i> | D-ribose pyranase                                        |
| CPE0079 | -1.57 | 8.83E-04 | <i>fus</i>  | elongation factor G                                      |
| CPE1453 | -1.57 | 6.29E-04 | <i>pepF</i> | oligoendopeptidase F                                     |
| CPE2350 | -1.57 | 6.95E-04 |             | hypothetical protein                                     |
| CPE0322 | -1.58 | 1.16E-03 |             | PTS system protein                                       |
| CPE2062 | -1.58 | 7.33E-04 |             | flavodoxin                                               |
| CPE1279 | -1.58 | 4.97E-04 | <i>nagK</i> | hyaluronidase                                            |
| CPE1835 | -1.59 | 4.70E-04 | <i>efp</i>  | elongation factor P                                      |
| CPE0328 | -1.59 | 8.98E-04 | <i>lacC</i> | tagatose-6-phosphate kinase                              |
| CPE2330 | -1.60 | 7.83E-04 |             | hypothetical protein                                     |
| CPE1754 | -1.60 | 4.50E-04 | <i>gpsA</i> | NAD(P)H-dependent glycerol-3-phosphate dehydrogenase     |
| CPE1076 | -1.60 | 8.93E-03 | <i>accA</i> | acetyl-CoA carboxylase carboxyltransferase subunit alpha |
| CPE2381 | -1.61 | 5.02E-04 | <i>infA</i> | translation initiation factor IF-1                       |
| CPE1452 | -1.61 | 4.76E-04 |             | rhomboid family protein                                  |
| CPE1943 | -1.61 | 3.23E-04 |             | astB/chuR-related protein                                |
| CPE2602 | -1.62 | 8.76E-04 |             | hypothetical protein                                     |

|         |       |          |             |                                                            |
|---------|-------|----------|-------------|------------------------------------------------------------|
| CPE2118 | -1.62 | 3.89E-03 | <i>selD</i> | selenophosphate synthetase                                 |
| CPE2176 | -1.62 | 4.76E-04 | <i>nagA</i> | N-acetylglucosamine-6-phosphate deacetylase                |
| CPE1393 | -1.62 | 5.17E-04 | <i>clpP</i> | ATP-dependent Clp protease proteolytic subunit             |
| CPE0858 | -1.63 | 1.32E-03 | <i>bdhA</i> | NADH-dependent butanol dehydrogenase                       |
| CPE1295 | -1.64 | 4.81E-04 | <i>smpB</i> | SsrA-binding protein                                       |
| CPE2177 | -1.64 | 5.56E-04 | <i>metK</i> | S-adenosylmethionine synthetase                            |
| CPE1845 | -1.64 | 9.84E-03 |             | hypothetical protein                                       |
| CPE0822 | -1.64 | 5.25E-04 |             | PTS system, mannose/fructose/sorbose family, IIC component |
| CPE1784 | -1.66 | 9.95E-04 | <i>nifU</i> | nitrogen fixation protein                                  |
| CPE0354 | -1.66 | 2.46E-04 |             | glmZ(sRNA)-inactivating NTPase                             |
| CPE2326 | -1.66 | 2.42E-03 |             | hypothetical protein                                       |
| CPE0132 | -1.66 | 4.17E-04 | <i>cinA</i> | competence damage-inducible protein A                      |
| CPE1004 | -1.67 | 3.10E-04 | <i>hprK</i> | HPr kinase/phosphorylase                                   |
| CPE0533 | -1.68 | 9.00E-03 |             | hypothetical protein                                       |
| CPE0313 | -1.69 | 1.81E-03 |             | glycolate oxidase subunit                                  |
| CPE1885 | -1.70 | 1.97E-04 | <i>pheT</i> | phenylalanyl-tRNA synthetase subunit beta                  |
| CPE1886 | -1.70 | 6.91E-04 | <i>pheS</i> | phenylalanyl-tRNA synthetase subunit alpha                 |
| CPE1434 | -1.70 | 3.37E-03 | <i>hemX</i> | uroporphyrinogen-III methyltransferase/synthase            |
| PCP39   | -1.70 | 3.21E-03 |             | hypothetical protein                                       |
| CPE0165 | -1.70 | 1.18E-03 |             | hypothetical protein                                       |
| CPE0995 | -1.71 | 4.03E-04 |             | glucanase                                                  |
| CPE0471 | -1.71 | 7.60E-04 |             | hypothetical protein                                       |
| CPE0320 | -1.72 | 1.89E-03 |             | PTS system mannose-specific transporter subunits II        |
| CPE1708 | -1.72 | 2.26E-04 | <i>rplS</i> | 50S ribosomal protein L19                                  |
| CPE2210 | -1.72 | 7.81E-03 |             | thiamine biosynthesis protein Thil                         |
| CPE0494 | -1.73 | 1.62E-03 |             | NDP-suger dehydrogenase                                    |
| CPE2552 | -1.73 | 1.74E-04 | <i>glpK</i> | glycerol kinase                                            |
| CPE1736 | -1.73 | 6.95E-04 |             | ribulose-phosphate 3-epimerase                             |
| CPE0916 | -1.73 | 9.95E-04 |             | hypothetical protein                                       |
| CPE0280 | -1.73 | 2.99E-03 |             | tetrapyrrole methylase                                     |
| CPE2071 | -1.73 | 4.96E-04 |             | glycosyl transferase, group 2 family protein               |
| CPE1632 | -1.73 | 4.77E-04 | <i>rbsK</i> | ribokinase                                                 |
| CPE1846 | -1.74 | 2.60E-03 | <i>dapF</i> | diaminopimelate epimerase                                  |
| CPE1747 | -1.75 | 2.72E-04 | <i>rpoZ</i> | DNA-directed RNA polymerase subunit omega                  |
| CPE0173 | -1.75 | 3.10E-04 | <i>colA</i> | collagenase                                                |
| CPE1919 | -1.75 | 2.32E-04 | <i>valS</i> | valyl-tRNA synthetase                                      |
| CPE0081 | -1.76 | 1.02E-03 | <i>glcK</i> | glucose kinase                                             |
| CPE2413 | -1.76 | 1.97E-04 | <i>rpoB</i> | DNA-directed RNA polymerase subunit beta                   |
| CPE0411 | -1.76 | 1.89E-03 |             | monooxygenase                                              |
| CPE1866 | -1.76 | 2.15E-04 |             | GTP-dependent nucleic acid-binding protein EngD            |
| CPE2427 | -1.77 | 3.86E-04 | <i>cysS</i> | cysteinyl-tRNA synthetase                                  |
| CPE2022 | -1.77 | 2.59E-04 |             | GatB/Yqey domain protein                                   |
| CPE2337 | -1.77 | 2.13E-04 | <i>glgP</i> | glycogen phosphorylase                                     |
| CPE1504 | -1.78 | 2.32E-03 |             | hypothetical protein                                       |

|         |       |          |                 |                                                    |
|---------|-------|----------|-----------------|----------------------------------------------------|
| CPE0550 | -1.78 | 2.55E-04 | <i>speE</i>     | spermidine synthase                                |
| CPE2401 | -1.78 | 3.65E-04 | <i>rpsS</i>     | 30S ribosomal protein S19                          |
| CPE2567 | -1.79 | 2.18E-04 |                 | hypothetical protein                               |
| CPE2167 | -1.79 | 1.09E-04 |                 | hypothetical protein                               |
| CPE0591 | -1.79 | 1.16E-03 |                 | glutaminase                                        |
| CPE1733 | -1.80 | 3.98E-04 |                 | hypothetical protein                               |
| CPE2143 | -1.81 | 9.08E-05 | <i>mreB</i>     | rod shape-determining protein MreB                 |
| SR18    | -1.81 | 2.13E-04 | <i>trnA-met</i> | Region between CPE0238 and CPE0239                 |
| CPE0003 | -1.81 | 7.93E-03 |                 | S4 domain protein                                  |
| CPE2067 | -1.82 | 2.16E-04 |                 | DJ-1 family protein                                |
| SR85    | -1.82 | 9.61E-05 |                 | Region between CPE2406 and CPE2407                 |
| CPE1092 | -1.82 | 2.13E-04 | <i>pac</i>      | choloylglycine hydrolase                           |
| CPE1893 | -1.83 | 1.94E-04 | <i>rpml</i>     | 50S ribosomal protein L35                          |
| CPE1686 | -1.83 | 1.95E-04 | <i>infB</i>     | translation initiation factor IF-2                 |
| CPE0715 | -1.83 | 6.89E-04 |                 | GNAT family acetyltransferase                      |
| CPE0102 | -1.84 | 5.92E-04 |                 | hypothetical protein                               |
| CPE1432 | -1.84 | 5.15E-04 | <i>hemL</i>     | glutamate-1-semialdehyde aminotransferase          |
| CPE1045 | -1.84 | 7.15E-04 | <i>cbiP</i>     | cobyric acid synthase                              |
| CPE1719 | -1.84 | 5.56E-04 | <i>acpP</i>     | acyl carrier protein                               |
| SR54    | -1.86 | 5.17E-04 |                 | Region between CPE1233 and CPE1234                 |
| CPE2470 | -1.86 | 2.89E-04 | <i>ftsH</i>     | ATP-dependent metalloprotease FtsH                 |
| CPE1642 | -1.86 | 1.80E-04 | <i>ntpK</i>     | V-type ATP synthase subunit K                      |
| CPE0524 | -1.86 | 1.49E-03 |                 | HAD hydrolase, IIB family                          |
| CPE2327 | -1.86 | 2.06E-04 | <i>glmS</i>     | glucosamine--fructose-6-phosphate aminotransferase |
| CPE2386 | -1.88 | 2.27E-04 | <i>rpLO</i>     | 50S ribosomal protein L15                          |
| CPE1908 | -1.88 | 4.16E-03 |                 | cob(I)alamin adenosyltransferase                   |
| CPE1700 | -1.89 | 1.26E-04 | <i>rpsB</i>     | 30S ribosomal protein S2                           |
| CPE1069 | -1.89 | 2.42E-04 | <i>fabD</i>     | malonyl CoA-ACP transacylase                       |
| CPE1433 | -1.90 | 3.43E-03 | <i>hemB</i>     | delta-aminolevulinic acid dehydratase              |
| CPE2013 | -1.90 | 1.99E-04 |                 | hypothetical protein                               |
| CPE1532 | -1.91 | 2.18E-04 | <i>sacA</i>     | sucrose-6-P hydrolase                              |
| CPE0831 | -1.91 | 2.45E-04 | <i>bgaL</i>     | beta-galactosidase                                 |
| CPE2192 | -1.91 | 6.17E-04 | <i>atpL</i>     | ATP synthase FOF1 subunit C                        |
| CPE1466 | -1.91 | 1.97E-04 |                 | PTS system protein                                 |
| CPE0036 | -1.92 | 7.77E-05 | <i>plc</i>      | phospholipase C                                    |
| SR2     | -1.92 | 1.92E-04 |                 | Region between CPE0013 and CPE0014                 |
| SR73    | -1.93 | 6.76E-05 |                 | Region between CPE2167 and CPE2168                 |
| CPE2190 | -1.93 | 1.99E-04 | <i>atpD</i>     | ATP synthase FOF1 subunit delta                    |
| CPE2606 | -1.94 | 6.39E-04 | <i>murA</i>     | UDP-N-acetylglucosamine 1-carboxyvinyltransferase  |
| CPE1526 | -1.94 | 3.57E-04 |                 | ABC transporter                                    |
| SR28    | -1.94 | 1.70E-04 | <i>trnA-met</i> | Region between CPE0511 and CPE0512                 |
| CPE0594 | -1.96 | 1.66E-03 |                 | hydrolase, NUDIX family                            |
| CPE1538 | -1.96 | 7.13E-03 | <i>asrA</i>     | anaerobic sulfite reductase subunit A              |



|         |       |          |              |                                                                     |
|---------|-------|----------|--------------|---------------------------------------------------------------------|
| CPE1689 | -1.97 | 3.83E-05 | <i>nusA</i>  | transcription elongation factor NusA                                |
| CPE2501 | -1.98 | 1.22E-04 |              | leucyl aminopeptidase                                               |
| CPE1954 | -1.99 | 9.84E-05 |              | hypothetical protein                                                |
| PCP55   | -2.00 | 5.92E-04 |              | Spo0A-like protein                                                  |
| CPE1732 | -2.01 | 3.53E-05 |              | DAK2 domain protein                                                 |
| CPE2402 | -2.01 | 1.01E-04 | <i>rplB</i>  | 50S ribosomal protein L2                                            |
| CPE1738 | -2.02 | 4.28E-05 |              | probable serine/threonine protein kinase                            |
| CPE2450 | -2.02 | 3.33E-03 |              | hypothetical protein                                                |
| CPE2338 | -2.04 | 4.41E-05 | <i>malQ</i>  | 4-alpha-glucanotransferase                                          |
| CPE0854 | -2.04 | 8.07E-03 | <i>aspC</i>  | aminotransferase class V                                            |
| CPE2660 | -2.04 | 6.25E-05 | <i>rpmH</i>  | 50S ribosomal protein L34                                           |
| CPE0318 | -2.05 | 5.12E-04 | <i>fucl</i>  | L-fucose isomerase                                                  |
| CPE1464 | -2.05 | 8.02E-05 |              | PTS system protein                                                  |
| CPE1394 | -2.05 | 7.28E-05 | <i>tig</i>   | trigger factor                                                      |
| CPE1059 | -2.07 | 7.22E-05 |              | hypothetical protein                                                |
| CPE1881 | -2.09 | 2.13E-04 | <i>mutS2</i> | recombination and DNA strand exchange inhibitor protein             |
| CPE0695 | -2.09 | 2.06E-03 | <i>aroB</i>  | 3-dehydroquinate synthase                                           |
| CPE1739 | -2.10 | 2.55E-04 |              | protein phosphatase 2C                                              |
| CPE1465 | -2.10 | 3.88E-05 |              | PTS system protein                                                  |
| CPE2448 | -2.10 | 3.24E-05 |              | PSP1 domain protein                                                 |
| CPE2230 | -2.10 | 2.40E-05 |              | serine protease                                                     |
| CPE2251 | -2.11 | 1.88E-04 | <i>pepD</i>  | aminoacyl-histidine dipeptidase                                     |
| CPE2424 | -2.11 | 7.28E-05 |              | RNA methyltransferase, TrmH family, group 3                         |
| CPE0091 | -2.13 | 5.92E-04 | <i>iolE</i>  | myo-inositol catabolism protein                                     |
| CPE0573 | -2.14 | 1.59E-04 |              | hypothetical protein                                                |
| CPE1208 | -2.14 | 9.61E-05 |              | hypothetical protein                                                |
| CPE2349 | -2.14 | 3.24E-05 |              | D-amino acid dehydrogenase small subunit                            |
| CPE2416 | -2.14 | 7.39E-05 | <i>rplA</i>  | 50S ribosomal protein L1                                            |
| CPE2191 | -2.15 | 3.98E-05 | <i>atpF</i>  | ATP synthase F0F1 subunit B                                         |
| CPE0319 | -2.17 | 9.74E-05 | <i>fucA</i>  | L-fuculose phosphate aldolase                                       |
| CPE0442 | -2.19 | 3.86E-04 |              | BFD-like iron-sulfur cluster-binding protein                        |
| PCP45   | -2.19 | 1.00E-04 |              | hypothetical protein                                                |
| CPE0818 | -2.19 | 8.99E-05 |              | endo-beta-N-acetylglucosaminidase                                   |
| CPE2403 | -2.19 | 3.72E-05 | <i>rplW</i>  | 50S ribosomal protein L23                                           |
| CPE1368 | -2.20 | 3.65E-04 |              | hypothetical protein                                                |
| CPE2483 | -2.22 | 1.25E-05 | <i>prsA</i>  | peptidylprolyl isomerase                                            |
| CPE1397 | -2.22 | 8.00E-04 |              | hypothetical protein                                                |
| CPE2488 | -2.22 | 2.99E-05 |              | DNA-binding response regulator                                      |
| CPE0144 | -2.23 | 4.03E-03 |              | RNA 2'-phosphotransferase-like protein                              |
| CPE2129 | -2.23 | 5.87E-05 |              | hypothetical protein                                                |
| PCP53   | -2.23 | 4.37E-05 |              | hypothetical protein                                                |
| CPE1862 | -2.24 | 6.88E-05 | <i>murE</i>  | UDP-N-acetylmuramoylalanyl-D-glutamate--2, 6-diaminopimelate ligase |
| CPE2417 | -2.24 | 7.02E-05 | <i>rplK</i>  | 50S ribosomal protein L11                                           |
| CPE2130 | -2.24 | 6.79E-05 | <i>rplU</i>  | 50S ribosomal protein L21                                           |

|         |       |          |              |                                                             |
|---------|-------|----------|--------------|-------------------------------------------------------------|
| CPE2466 | -2.24 | 1.29E-04 | <i>greA</i>  | transcription elongation factor GreA                        |
| CPE2343 | -2.26 | 1.50E-05 |              | maltose ABC transporter                                     |
| CPE0739 | -2.26 | 8.20E-03 |              | thioredoxin                                                 |
| CPE2303 | -2.27 | 9.80E-05 |              | heavy metal-transporting ATPase                             |
| CPE0732 | -2.27 | 5.39E-04 |              | hypothetical protein                                        |
| CPE0321 | -2.28 | 4.89E-05 |              | PTS system protein                                          |
| CPE2289 | -2.28 | 1.13E-05 | <i>groEL</i> | molecular chaperone GroEL                                   |
| CPE2404 | -2.29 | 3.24E-05 | <i>rplD</i>  | 50S ribosomal protein L4                                    |
| CPE0297 | -2.29 | 3.24E-05 | <i>tktC</i>  | transketolase C-terminal section                            |
| PCP47   | -2.31 | 1.70E-04 | <i>topA</i>  | type I topoisomerase                                        |
| CPE1718 | -2.31 | 5.98E-05 | <i>rnc</i>   | ribonuclease III                                            |
| CPE1780 | -2.31 | 8.19E-05 | <i>alaS</i>  | alanyl-tRNA synthetase                                      |
| CPE1861 | -2.32 | 4.41E-05 | <i>murF</i>  | UDP-N-acetylmuramoyl-tripeptide--D-alanyl-D- alanine ligase |
| CPE0326 | -2.32 | 4.31E-03 | <i>lacA</i>  | galactose-6-phosphate isomerase subunit LacA                |
| CPE1012 | -2.33 | 2.65E-05 |              | endoribonuclease L-PSP                                      |
| CPE2618 | -2.35 | 9.97E-05 |              | hypothetical protein                                        |
| CPE1209 | -2.36 | 3.30E-05 |              | hypothetical protein                                        |
| CPE0381 | -2.36 | 5.16E-04 |              | hypothetical protein                                        |
| CPE1717 | -2.36 | 3.39E-05 |              | radical SAM domain protein                                  |
| CPE1876 | -2.36 | 5.71E-04 |              | hypothetical protein                                        |
| CPE2376 | -2.37 | 3.42E-05 | <i>rpoA</i>  | DNA-directed RNA polymerase subunit alpha                   |
| CPE1074 | -2.37 | 3.24E-05 | <i>accC</i>  | biotin carboxylase                                          |
| CPE2641 | -2.37 | 6.98E-05 |              | phage-related single-strand DNA-binding protein             |
| CPE1698 | -2.38 | 1.53E-05 | <i>pyrH</i>  | uridylate kinase                                            |
| CPE1044 | -2.39 | 3.16E-04 |              | hypothetical protein                                        |
| CPE1939 | -2.39 | 1.71E-05 | <i>apt</i>   | adenine phosphoribosyltransferase                           |
| CPE2391 | -2.40 | 1.24E-05 | <i>rpsH</i>  | 30S ribosomal protein S8                                    |
| CPE2189 | -2.41 | 7.96E-06 | <i>atpA</i>  | ATP synthase FOF1 subunit alpha                             |
| CPE1765 | -2.41 | 8.66E-06 | <i>ftsZ</i>  | cell division protein FtsZ                                  |
| CPE2188 | -2.41 | 2.40E-05 | <i>atpG</i>  | ATP synthase FOF1 subunit gamma                             |
| CPE2052 | -2.42 | 1.29E-05 | <i>deoC</i>  | deoxyribose-phosphate aldolase                              |
| CPE1951 | -2.42 | 1.06E-04 | <i>cpdA</i>  | 2', 3'-cyclic nucleotide 2'-phosphodiesterase               |
| CPE1354 | -2.42 | 7.16E-06 | <i>entB</i>  | enterotoxin                                                 |
| CPE2187 | -2.43 | 1.14E-05 | <i>atpB</i>  | ATP synthase FOF1 subunit beta                              |
| CPE2400 | -2.44 | 2.41E-05 | <i>rplV</i>  | 50S ribosomal protein L22                                   |
| PCP37   | -2.45 | 2.55E-03 |              | hypothetical protein                                        |
| CPE2434 | -2.45 | 7.74E-06 | <i>nagB</i>  | glucosamine-6-phosphate deaminase                           |
| CPE2642 | -2.47 | 3.83E-05 | <i>rpsF</i>  | 30S ribosomal protein S6                                    |
| CPE2652 | -2.48 | 9.00E-05 | <i>soj</i>   | sporulation initiation inhibitor protein soj                |
| PCP46   | -2.48 | 1.70E-04 |              | conjugal transfer ATP-binding protein TraC                  |
| CPE1068 | -2.48 | 9.97E-05 | <i>fabH</i>  | 3-oxoacyl-ACP synthase                                      |
| CPE0998 | -2.49 | 8.86E-06 | <i>gltX</i>  | glutamyl-tRNA synthetase                                    |
| CPE2387 | -2.50 | 2.16E-05 | <i>rpmD</i>  | 50S ribosomal protein L30                                   |
| CPE2405 | -2.51 | 1.24E-05 | <i>rplC</i>  | 50S ribosomal protein L3                                    |

|         |       |          |             |                                                        |
|---------|-------|----------|-------------|--------------------------------------------------------|
| CPE2447 | -2.51 | 3.42E-05 | <i>fer</i>  | ferredoxin                                             |
| CPE2301 | -2.52 | 8.02E-06 | <i>crt</i>  | 3-hydroxybutyryl-CoA dehydratase                       |
| CPE1233 | -2.53 | 9.00E-06 |             | hypothetical protein                                   |
| CPE0329 | -2.53 | 3.99E-06 |             | hypothetical protein                                   |
| CPE2408 | -2.54 | 2.47E-05 | <i>fus</i>  | elongation factor G                                    |
| CPE2530 | -2.55 | 4.48E-06 |             | xaa-pro aminopeptidase                                 |
| CPE2428 | -2.57 | 2.42E-05 | <i>proS</i> | prolyl-tRNA synthetase                                 |
| CPE1472 | -2.57 | 6.50E-06 |             | hypothetical protein                                   |
| CPE2186 | -2.58 | 1.76E-05 | <i>atpC</i> | ATP synthase FOF1 subunit epsilon                      |
| CPE2414 | -2.58 | 9.59E-06 | <i>rplL</i> | 50S ribosomal protein L7/L12                           |
| CPE2415 | -2.63 | 1.25E-05 | <i>rplJ</i> | 50S ribosomal protein L10                              |
| CPE0029 | -2.63 | 1.33E-03 |             | TetR family transcriptional regulator                  |
| CPE1073 | -2.64 | 3.85E-05 | <i>fabZ</i> | (3R)-hydroxymyristoyl-ACP dehydratase                  |
| CPE0664 | -2.64 | 9.52E-06 |             | hypothetical protein                                   |
| CPE1321 | -2.65 | 2.64E-04 | <i>cysE</i> | serine O-acetyltransferase                             |
| CPE0296 | -2.68 | 1.14E-05 | <i>tktN</i> | transketolase N-terminal section                       |
| CPE2294 | -2.70 | 3.80E-04 |             | hypothetical protein                                   |
| CPE1030 | -2.70 | 3.91E-05 |             | hypothetical protein                                   |
| CPE1072 | -2.73 | 4.32E-05 | <i>accB</i> | acetyl-CoA carboxylase biotin carboxyl carrier protein |
| CPE1536 | -2.75 | 1.56E-03 | <i>asrC</i> | anaerobic sulfite reductase subunit C                  |
| CPE0547 | -2.76 | 2.58E-06 |             | nitrite/sulfite reductase-like protein                 |
| CPE2377 | -2.77 | 7.37E-06 | <i>rpsD</i> | 30S ribosomal protein S4                               |
| CPE2375 | -2.78 | 8.92E-06 | <i>rplQ</i> | 50S ribosomal protein L17                              |
| CPE2236 | -2.80 | 1.74E-03 |             | hypothetical protein                                   |
| CPE0734 | -2.81 | 1.14E-05 | <i>naoX</i> | pyridine nucleotide-disulphide oxidoreductase          |
| CPE2128 | -2.82 | 9.28E-06 | <i>rpmA</i> | 50S ribosomal protein L27                              |
| CPE2016 | -2.83 | 2.70E-06 |             | cytidine deaminase                                     |
| CPE2379 | -2.83 | 4.17E-06 | <i>rpsM</i> | 30S ribosomal protein S13                              |
| CPE1257 | -2.83 | 2.70E-06 |             | hypothetical protein                                   |
| CPE0576 | -2.83 | 1.71E-05 |             | ABC transporter                                        |
| CPE2390 | -2.84 | 2.70E-06 | <i>rplF</i> | 50S ribosomal protein L6                               |
| PCP44   | -2.84 | 1.37E-04 |             | cell wall-binding protein                              |
| CPE2297 | -2.84 | 7.93E-06 |             | 3-hydroxybutyryl-CoA dehydrogenase                     |
| CPE0014 | -2.86 | 3.42E-06 | <i>serS</i> | seryl-tRNA synthetase                                  |
| CPE2392 | -2.86 | 2.70E-06 | <i>rpsN</i> | 30S ribosomal protein S14                              |
| CPE0740 | -2.89 | 2.27E-03 |             | hypothetical protein                                   |
| CPE1231 | -2.91 | 3.81E-06 |             | surface protein                                        |
| CPE2410 | -2.94 | 6.56E-06 | <i>rpsL</i> | 30S ribosomal protein S12                              |
| CPE2298 | -2.95 | 1.15E-05 | <i>fixB</i> | 3-hydroxybutyryl-CoA dehydrogenase                     |
| CPE2369 | -2.95 | 1.59E-06 | <i>rpsI</i> | 30S ribosomal protein S9                               |
| CPE0421 | -2.97 | 1.41E-03 | <i>glpQ</i> | glycerophosphodiester phosphodiesterase                |
| CPE1428 | -2.97 | 7.37E-06 | <i>clpB</i> | clpB protein                                           |
| CPE1322 | -2.98 | 1.99E-05 | <i>cysK</i> | cysteine synthase A                                    |
| CPE2346 | -2.99 | 2.10E-06 | <i>hydA</i> | iron hydrogenase                                       |

|         |       |          |              |                                             |
|---------|-------|----------|--------------|---------------------------------------------|
| CPE0554 | -2.99 | 1.63E-05 |              | hypothetical protein                        |
| CPE1523 | -3.02 | 3.05E-06 | <i>nagL</i>  | hyaluronidase                               |
| CPE1422 | -3.03 | 4.26E-06 |              | hypothetical protein                        |
| CPE1067 | -3.06 | 5.16E-04 |              | MarR family transcriptional regulator       |
| CPE1699 | -3.06 | 1.10E-06 | <i>tsf</i>   | elongation factor Ts                        |
| CPE1473 | -3.06 | 2.27E-05 |              | hypothetical protein                        |
| CPE2397 | -3.08 | 4.46E-06 | <i>rpmC</i>  | 50S ribosomal protein L29                   |
| CPE0416 | -3.09 | 8.66E-06 | <i>htpG</i>  | heat shock protein 90                       |
| CPE0876 | -3.09 | 8.62E-05 |              | GNAT family acetyltransferase               |
| CPE0530 | -3.09 | 1.26E-05 | <i>ldhD</i>  | D-lactate dehydrogenase                     |
| CPE2399 | -3.09 | 3.43E-06 | <i>rpsC</i>  | 30S ribosomal protein S3                    |
| CPE2304 | -3.11 | 5.28E-04 |              | transcriptional regulator                   |
| CPE2393 | -3.11 | 1.24E-06 | <i>rplE</i>  | 50S ribosomal protein L5                    |
| CPE2290 | -3.12 | 7.39E-04 | <i>groES</i> | co-chaperonin GroES                         |
| CPE2001 | -3.12 | 4.00E-04 |              | radical SAM domain protein                  |
| CPE0903 | -3.12 | 3.94E-06 | <i>pduJ</i>  | propanediol utilization protein             |
| CPE2409 | -3.14 | 3.20E-06 | <i>rpsG</i>  | 30S ribosomal protein S7                    |
| CPE0641 | -3.14 | 8.66E-06 | <i>phoU</i>  | phosphate transporter PhoU                  |
| CPE0082 | -3.14 | 4.17E-06 |              | hypothetical protein                        |
| CPE0628 | -3.16 | 9.15E-06 | <i>licB</i>  | lic-1 operon protein                        |
| CPE2622 | -3.16 | 8.74E-07 | <i>purA</i>  | adenylosuccinate synthetase                 |
| CPE2398 | -3.17 | 3.66E-06 | <i>rplP</i>  | 50S ribosomal protein L16                   |
| CPE2300 | -3.18 | 1.86E-06 | <i>bcd</i>   | butyryl-CoA dehydrogenase                   |
| CPE1531 | -3.19 | 7.08E-06 |              | fructokinase                                |
| CPE0278 | -3.19 | 1.23E-06 |              | invasion associated secreted endopeptidase  |
| CPE2421 | -3.23 | 2.15E-06 | <i>tuf</i>   | elongation factor Tu                        |
| CPE2396 | -3.25 | 2.40E-06 | <i>rpsQ</i>  | 30S ribosomal protein S17                   |
| CPE2003 | -3.26 | 1.92E-06 |              | nucleoside hydrolase, IUNH family           |
| CPE1534 | -3.27 | 2.47E-05 |              | PTS system, sucrose-specific IIBC component |
| CPE2407 | -3.28 | 1.92E-06 | <i>tuf</i>   | elongation factor Tu                        |
| CPE0627 | -3.29 | 1.37E-06 | <i>licA</i>  | choline kinase                              |
| CPE2478 | -3.30 | 8.99E-05 |              | S4 domain protein                           |
| CPE0639 | -3.32 | 2.99E-05 |              | phosphate ABC transporter permease          |
| PCP54   | -3.35 | 1.09E-05 |              | hypothetical protein                        |
| CPE2394 | -3.37 | 1.09E-06 | <i>rplX</i>  | 50S ribosomal protein L24                   |
| CPE2388 | -3.38 | 1.73E-06 | <i>rpsE</i>  | 30S ribosomal protein S5                    |
| CPE2370 | -3.39 | 1.57E-06 | <i>rplM</i>  | 50S ribosomal protein L13                   |
| CPE0638 | -3.41 | 8.86E-06 |              | phosphate ABC transporter permease          |
| CPE2035 | -3.43 | 1.16E-05 | <i>hrcA</i>  | heat-inducible transcription repressor      |
| CPE1003 | -3.43 | 4.66E-06 |              | hypothetical protein                        |
| CPE1421 | -3.44 | 5.10E-07 |              | hypothetical protein                        |
| PCP36   | -3.45 | 6.44E-06 |              | hypothetical protein                        |
| PCP35   | -3.46 | 1.24E-06 |              | DNA primase                                 |
| CPE2555 | -3.48 | 2.83E-06 |              | hypothetical protein                        |

|         |       |          |                 |                                                     |
|---------|-------|----------|-----------------|-----------------------------------------------------|
| CPE0915 | -3.50 | 2.83E-06 |                 | NADPH-dependent FMN reductase                       |
| CPE1362 | -3.50 | 3.83E-05 |                 | dephospho-CoA kinase                                |
| CPE0163 | -3.58 | 8.74E-07 | <i>pfoA</i>     | perfringolysin O                                    |
| CPE1070 | -3.62 | 2.21E-05 | <i>fabG</i>     | 3-ketoacyl-ACP reductase                            |
| CPE0640 | -3.63 | 1.58E-05 |                 | phosphate transporter ATP-binding protein           |
| CPE2061 | -3.66 | 1.24E-06 |                 | pyruvate-flavodoxin oxidoreductase                  |
| CPE2378 | -3.72 | 7.53E-07 | <i>rpsK</i>     | 30S ribosomal protein S11                           |
| CPE0845 | -3.73 | 1.24E-06 |                 | hypothetical protein                                |
| CPE2389 | -3.75 | 8.74E-07 | <i>rplR</i>     | 50S ribosomal protein L18                           |
| CPE2195 | -3.75 | 7.53E-07 | <i>atoB</i>     | acetyl-CoA acetyltransferase                        |
| CPE2032 | -3.77 | 8.40E-07 | <i>dnaJ</i>     | molecular chaperone DnaJ                            |
| SR3     | -3.80 | 7.82E-07 | <i>trnA-Ser</i> | Region between CPE0041 and CPE0042                  |
| CPE1071 | -3.81 | 1.24E-06 | <i>fabF</i>     | 3-oxoacyl-ACP synthase                              |
| CPE0238 | -3.81 | 2.10E-06 |                 | hypothetical protein                                |
| CPE2348 | -3.88 | 5.10E-07 | <i>ptb</i>      | phosphate butyryltransferase                        |
| CPE2299 | -3.88 | 5.10E-07 | <i>etfB</i>     | electron transfer flavoprotein beta subunit         |
| CPE2395 | -3.90 | 5.10E-07 | <i>rplN</i>     | 50S ribosomal protein L14                           |
| CPE0875 | -3.98 | 4.08E-07 |                 | metalloprotease                                     |
| CPE0629 | -4.00 | 5.10E-07 | <i>licC</i>     | lic-1 operon protein                                |
| CPE0846 | -4.08 | 1.64E-07 |                 | alpha-clostripain                                   |
| CPE1031 | -4.11 | 2.86E-06 |                 | transcriptional regulator                           |
| CPE0637 | -4.14 | 4.46E-06 |                 | phosphate ABC transporter phosphate-binding protein |
| CPE2034 | -4.32 | 2.72E-07 | <i>grpE</i>     | heat shock protein GrpE                             |
| CPE2033 | -4.50 | 7.62E-07 | <i>dnaK</i>     | molecular chaperone DnaK                            |
| CPE1006 | -4.58 | 7.06E-08 |                 | aminopeptidase 1                                    |
| CPE2347 | -4.69 | 7.06E-08 | <i>buk</i>      | butyrate kinase                                     |
| CPE0992 | -4.75 | 1.10E-06 |                 | oxidoreductase, 2-nitropropane dioxygenase          |
| CPE0170 | -4.95 | 4.18E-08 | <i>arcD</i>     | arginine/ornithine antiporter                       |
| CPE0168 | -5.00 | 2.15E-06 | <i>arcA</i>     | arginine deiminase                                  |
| CPE0636 | -5.22 | 4.18E-08 |                 | phosphate ABC transporter phosphate-binding protein |
| CPE2074 | -5.33 | 1.70E-06 |                 | trans-2-enoyl-CoA reductase                         |
| CPE0568 | -5.70 | 5.10E-07 | <i>ribA</i>     | riboflavin biosynthesis protein RibA                |
| CPE0566 | -6.09 | 1.09E-06 | <i>ribB</i>     | riboflavin biosynthesis protein RibD                |
| CPE0172 | -6.22 | 2.17E-09 | <i>argR</i>     | arginine repressor ArgR                             |
| CPE0569 | -6.52 | 9.35E-08 | <i>ribH</i>     | 6,7-dimethyl-8-ribityllumazine synthase             |
| CPE0171 | -6.58 | 9.30E-10 | <i>arcC</i>     | carbamate kinase                                    |
| CPE0169 | -6.63 | 9.30E-10 | <i>arcB</i>     | ornithine carbamoyltransferase                      |
| CPE0567 | -6.81 | 7.53E-07 | <i>risA</i>     | riboflavin synthase subunit alpha                   |
