# Supplementary material for: Concurrent Host-Pathogen Transcriptional Responses in a Clostridium perfringens Murine Myonecrosis Infection
Source: PubMed Central journal article supplement (PMC5874911; doi:10.1128/mbio.00473-18), 2018-03-27
Supplement: mbo002183811st4.pdf [file mbo002183811st4.pdf]

**TABLE S4** Differentially expressed regulatory genes.

| Locus tag | Gene name   | Product                                              | Log <sub>2</sub> fold change ( <i>in vivo</i> vs <i>in vitro</i> ) | FDR      |
|-----------|-------------|------------------------------------------------------|--------------------------------------------------------------------|----------|
| CPE0084   | <i>iolR</i> | putative transcription repressor                     | 2.16                                                               | 1.38E-04 |
| CPE0207   |             | putative two-component sensor histidine kinase       | 2.01                                                               | 4.47E-03 |
| CPE0235   |             | putative sensor histidine kinase                     | 3.33                                                               | 1.91E-03 |
| CPE0245   |             | GGDEF/EAL regulatory domain protein                  | 2.96                                                               | 3.44E-03 |
| CPE0346   |             | putative transcriptional regulator                   | 3.02                                                               | 3.84E-03 |
| CPE0347   |             | putative transcriptional regulator                   | 3.06                                                               | 3.43E-03 |
| CPE0370   |             | putative transcriptional regulator                   | 3.47                                                               | 5.99E-04 |
| CPE0386   |             | putative transcriptional regulator                   | 2.93                                                               | 3.78E-04 |
| CPE0642   | <i>revR</i> | orphan response regulator                            | -0.93                                                              | 6.44E-02 |
| CPE0789   |             | putative transcriptional regulator                   | 1.54                                                               | 1.97E-03 |
| CPE0965   |             | GGDEF regulatory domain protein                      | 4.13                                                               | 3.10E-04 |
| CPE1144   |             | putative transcriptional regulator                   | 2.10                                                               | 6.07E-04 |
| CPE1283   |             | putative transcriptional regulator                   | 1.98                                                               | 2.14E-03 |
| CPE1316   |             | putative sensor histidine kinase                     | 1.64                                                               | 3.21E-03 |
| CPE1446   |             | transcriptional regulator with HTH motif             | 0.50                                                               | 1.96E-01 |
| CPE1447   |             | transcriptional regulator with HTH motif             | 0.74                                                               | 7.82E-02 |
| CPE1500   | <i>virS</i> | VirSR two-component sensor histidine kinase          | 0.24                                                               | 8.73E-03 |
| CPE1501   | <i>virR</i> | VirSR two-component response regulator               | 1.80                                                               | 7.06E-02 |
| CPE1512   | <i>reeS</i> | orphan hybrid sensor histidine kinase                | 0.96                                                               | 3.10E-02 |
| CPE1560   | <i>agrD</i> | autoinducer propeptide                               | 0.10                                                               | 1.53E-02 |
| CPE1561   | <i>agrB</i> | accessory gene regulator protein B                   | 0.35                                                               | 3.54E-01 |
| CPE1759   | <i>nrdR</i> | putative transcriptional regulator                   | 1.68                                                               | 9.37E-04 |
| CPE1926   |             | putative sensor histidine kinase                     | 2.25                                                               | 3.24E-04 |
| CPE1987   |             | putative sensor histidine kinase                     | 3.20                                                               | 2.01E-03 |
| CPE2168   | <i>tex</i>  | toxin Expression protein                             | -1.28                                                              | 1.91E-03 |
| CPE2358   |             | putative sigma-L-dependent transcriptional regulator | 2.08                                                               | 1.65E-04 |
| CPE2494   |             | putative transcriptional regulator                   | 1.69                                                               | 4.77E-04 |
| CPE2539   | <i>ccpA</i> | putative transcriptional regulator                   | 1.30                                                               | 4.96E-03 |
