# Supplementary material for: Concurrent Host-Pathogen Transcriptional Responses in a Clostridium perfringens Murine Myonecrosis Infection
Source: PubMed Central journal article supplement (PMC5874911; doi:10.1128/mbio.00473-18), 2018-03-27
Supplement: mbo002183811st5.pdf [file mbo002183811st5.pdf]

**TABLE S5** Differentially expressed pCP13 genes\*.

| <b>Locus Tag</b> | <b>Log<sub>2</sub> Fold Change</b> | <b>FDR</b> | <b>Gene</b> | <b>Product</b>                             |
|------------------|------------------------------------|------------|-------------|--------------------------------------------|
| PCP12            | 5.21                               | 3.22E-05   |             | hypothetical protein                       |
| PCP10            | 4.64                               | 2.47E-04   |             | transposase                                |
| PCP20            | 4.16                               | 3.80E-04   |             | hypothetical protein                       |
| PCP05            | 3.89                               | 2.75E-03   |             | transposase                                |
| PCP13            | 3.38                               | 2.44E-03   |             | hypothetical protein                       |
| PCP30            | 2.59                               | 7.25E-03   |             | hypothetical protein                       |
| PCP63            | 2.36                               | 5.69E-05   |             | hypothetical protein                       |
| PCP59            | 2.01                               | 1.89E-04   |             | hypothetical protein                       |
| PCP60            | 1.90                               | 1.66E-04   |             | hypothetical protein                       |
| PCP62            | 1.90                               | 2.80E-03   |             | hypothetical protein                       |
| PCP58            | 1.81                               | 6.17E-04   |             | PemK                                       |
| PCP33            | 1.46                               | 2.27E-03   |             | hypothetical protein                       |
| PCP32            | 1.23                               | 5.95E-03   |             | resolvase                                  |
| PCP57            | -1.10                              | 8.22E-03   | <i>cnaB</i> | collagen adhesin                           |
| PCP51            | -1.21                              | 6.70E-03   |             | type IV secretion system protein VirD4     |
| PCP50            | -1.27                              | 4.56E-03   |             | hypothetical protein                       |
| PCP29            | -1.37                              | 2.26E-03   |             | hypothetical protein                       |
| PCP39            | -1.70                              | 3.21E-03   |             | hypothetical protein                       |
| PCP55            | -2.00                              | 5.92E-04   |             | Spo0A-like protein                         |
| PCP45            | -2.19                              | 1.00E-04   |             | hypothetical protein                       |
| PCP53            | -2.23                              | 4.37E-05   |             | hypothetical protein                       |
| PCP47            | -2.31                              | 1.70E-04   | <i>topA</i> | type I topoisomerase                       |
| PCP37            | -2.45                              | 2.55E-03   |             | hypothetical protein                       |
| PCP46            | -2.48                              | 1.70E-04   |             | conjugal transfer ATP-binding protein TraC |
| PCP44            | -2.84                              | 1.37E-04   |             | cell wall-binding protein                  |
| PCP54            | -3.35                              | 1.09E-05   |             | hypothetical protein                       |
| PCP36            | -3.45                              | 6.44E-06   |             | hypothetical protein                       |
| PCP35            | -3.46                              | 1.24E-06   |             | DNA primase                                |

\* defined by FDR <0.01 and log<sub>2</sub> (fold change) > 1.
