# Supplementary material for: Concurrent Host-Pathogen Transcriptional Responses in a Clostridium perfringens Murine Myonecrosis Infection
Source: PubMed Central journal article supplement (PMC5874911; doi:10.1128/mbio.00473-18), 2018-03-27
Supplement: mbo002183811st6.pdf [file mbo002183811st6.pdf]

**TABLE S6** Summary of mapped *C. perfringens* and murine RNA-seq reads.

| <i>C. perfringens</i> | Mapped reads                               |                              |
|-----------------------|--------------------------------------------|------------------------------|
|                       | <i>in vivo</i> <sup>a</sup>                | <i>in vitro</i> <sup>a</sup> |
| <b>Replicate 1</b>    | 2,164,911                                  | 1,819,981                    |
| <b>Replicate 2</b>    | 1,823,412                                  | 1,389,633                    |
| <b>Replicate 3</b>    | 1,759,987                                  | 1,374,988                    |
| <b>Total reads</b>    | <b>5,748,310</b>                           | <b>4,584,602</b>             |
| <b>Host</b>           | <b><i>C. perfringens</i> infected host</b> | <b>Mock-infected host</b>    |
| <b>Replicate 1</b>    | 21,241,035                                 | 27,713,718                   |
| <b>Replicate 2</b>    | 22,033,729                                 | 25,463,014                   |
| <b>Replicate 3</b>    | 19,942,403                                 | 29,983,040                   |
| <b>Total reads</b>    | <b>63,217,167</b>                          | <b>83,159,772</b>            |

<sup>a</sup> RNA-seq analysis of the enriched RNA samples from the *in vivo*- and *in vitro*-derived *C. perfringens* cells was carried out on Illumina Hi-seq and Mi-seq instruments, respectively, which accounts for higher number of reads in the *in vivo* samples. .
