# Supplementary material for: Concurrent Host-Pathogen Transcriptional Responses in a Clostridium perfringens Murine Myonecrosis Infection
Source: PubMed Central journal article supplement (PMC5874911; doi:10.1128/mbio.00473-18), 2018-03-27
Supplement: mbo002183811st7.pdf [file mbo002183811st7.pdf]

**TABLE S7** Oligonucleotide primers for QRT-PCR reactions.

| <b>Name</b>    | <b>Sequence (5'-3')</b>     | <b>Function</b>                |
|----------------|-----------------------------|--------------------------------|
| <b>JRP2479</b> | CCATCTGTTTTATATCTGCTCCAGTA  | <i>rpoA</i> , forward primer   |
| <b>JRP2480</b> | GGAAGGTGAAGGACCAAAACTATT    | <i>rpoA</i> , reverse primer   |
| <b>JRP5778</b> | GGGGCAGCTAGCCTCATTA         | <i>pscX</i> , forward primer   |
| <b>JRP5779</b> | CATCGCCTAACCCAAATTT         | <i>pscXF</i> , reverse primer  |
| <b>JRP5794</b> | GCCAATAAAGATGAAATGGGTTT     | <i>fbpA</i> , forward primer   |
| <b>JRP5795</b> | TTTCAGATGCAGGAGGGAAT        | <i>fbpA</i> , reverse primer   |
| <b>JRP5922</b> | TTTTCCACCACATCAGCAG         | <i>pilT</i> , forward primer   |
| <b>JRP5923</b> | CTCCATCAACGGTTTCCACT        | <i>pilT</i> , reverse primer   |
| <b>JRP5780</b> | TGGCCATATTGATTCCACTG        | <i>risA</i> , forward primer   |
| <b>JRP5781</b> | TTCCCTTTAACCTCTGCAA         | <i>risA</i> , reverse primer   |
| <b>JRP4126</b> | GGAGCAATTGATGAGTTAGTGCTAAGT | <i>pfoA</i> , forward primer   |
| <b>JRP4127</b> | TTCTGAATATTGAGTTCTTGCTGGTAA | <i>pfoA</i> , reverse primer   |
| <b>JRP5406</b> | TGTAAGGCGCTTATTTGTGC        | <i>plc</i> , forward primer    |
| <b>JRP5407</b> | AAGCGTAGACTTTAGTTGATGCC     | <i>plc</i> , reverse primer    |
| <b>JRP5924</b> | TGTGTTTTGAAGGGGTAGGA        | <i>codY</i> , forward primer   |
| <b>JRP5925</b> | TCATCATTAAATTCTTCCCCAAA     | <i>codY</i> , reverse primer   |
| <b>TLR2F</b>   | CCCTGTGCCACCATTTC           | <i>Tlr2</i> , forward primer   |
| <b>TLR2R</b>   | CCACGCCACATCATTCTC          | <i>Tlr2</i> , reverse primer   |
| <b>NFκBIZF</b> | TGATGAGGAAGGGAGCTGAC        | <i>Nfkbiz</i> , forward primer |
| <b>NFκBIZR</b> | TGAATGGACTTCCCCTTCAG        | <i>Nfkbiz</i> , reverse primer |
| <b>TNFF</b>    | CAAATTCGAGTGACAAGCCTG       | <i>Tnf</i> , forward primer    |
| <b>TNFR</b>    | GAGATCCATGCCGTTGGC          | <i>Tnf</i> , reverse primer    |
| <b>CXCL2F</b>  | AACATCCAGAGCTTGAGTGTGA      | <i>Cxcl2</i> , forward primer  |
| <b>CXCL2R</b>  | TTCAGGGTCAAGGCAAACCTT       | <i>Cxcl2</i> , reverse primer  |
| <b>II1bF</b>   | CAACCAACAAGTGATATTCTCCATG   | <i>Il1b</i> , forward primer   |
| <b>II1bR</b>   | GATCCACACTCTCCAGCTGCA       | <i>Il1b</i> , reverse primer   |
| <b>II6F</b>    | ATGGATGCTACCAAACCTGGAT      | <i>Il6</i> , forward primer    |
| <b>II6R</b>    | TGAAGGACTCTGGCTTTGTCT       | <i>Il6</i> , reverse primer    |
